# Supplementary material for: Xanthones and anthraquinones from the soil fungus Penicillium sp. DWS10-P-6
Source: Royal Society of Chemistry journal article supplement (doi:10.1039/d0ra08141h), 2021-01-01

## Supplementary Information

### Xanthones and Anthraquinones from the soil fungus

#### *Penicillium* sp. DWS10-P-6

Ya-jing Wang <sup>a</sup>, Nan Ma <sup>a</sup>, Chun-yue Liu <sup>a</sup>, Yi-xuan Feng <sup>a</sup>, Feng-xiang Zhang <sup>d</sup>,  
Chang Li <sup>a,\*</sup>, and Yue-hu Pei <sup>a, b\*</sup>

<sup>a</sup> *Department of Medicinal Chemistry and Natural Medicine Chemistry, College of Pharmacy, HarBin Medical University, HarBin 150081, People's Republic of China;*

<sup>b</sup> *Shenyang Pharmaceutical University, Shenyang 110016, People's Republic of China;*

<sup>c</sup> *The first Affiliated Hospital of Jinan University, GuangZhou 510632, People's Republic of China.*

\* E mail: lichang661@126.com; [peiyueh@vip.163.com](mailto:peiyueh@vip.163.com).

\* *To whom correspondence should be addressed.*

# Contents

|                                                                                |    |
|--------------------------------------------------------------------------------|----|
| 1. The spectra of penicillone A ( <b>1</b> ) .....                             | 5  |
| <b>Figure S1.</b> The UV spectrum of compound <b>1</b> .....                   | 5  |
| <b>Figure S2.</b> The IR spectrum of compound <b>1</b> .....                   | 5  |
| <b>Figure S3.</b> The HR-ESI-MS spectrum of compound <b>1</b> .....            | 6  |
| <b>Figure S4.</b> The <sup>1</sup> H-NMR spectrum of compound <b>1</b> .....   | 6  |
| <b>Figure S5.</b> The <sup>13</sup> C-NMR spectrum of compound <b>1</b> .....  | 7  |
| <b>Figure S6.</b> The HSQC spectrum of compound <b>1</b> .....                 | 7  |
| <b>Figure S7.</b> The HMBC spectrum of compound <b>1</b> .....                 | 8  |
| <b>Figure S8.</b> The NOESY spectrum of compound <b>1</b> .....                | 8  |
| 2. The spectra of penicillone B ( <b>2</b> ) .....                             | 9  |
| <b>Figure S9.</b> The UV spectrum of compound <b>2</b> .....                   | 9  |
| <b>Figure S10.</b> The IR spectrum of compound <b>2</b> .....                  | 9  |
| <b>Figure S11.</b> The HR-ESI-MS spectrum of compound <b>2</b> .....           | 10 |
| <b>Figure S12.</b> The <sup>1</sup> H-NMR spectrum of compound <b>2</b> .....  | 10 |
| <b>Figure S13.</b> The <sup>13</sup> C-NMR spectrum of compound <b>2</b> ..... | 11 |
| <b>Figure S14.</b> The HSQC spectrum of compound <b>2</b> .....                | 11 |
| <b>Figure S15.</b> The HMBC spectrum of compound <b>2</b> .....                | 12 |
| <b>Figure S16.</b> The NOESY spectrum of compound <b>2</b> .....               | 12 |
| 3. The spectra of penicillone C ( <b>3</b> ) .....                             | 13 |
| <b>Figure S17.</b> The UV spectrum of compound <b>3</b> .....                  | 13 |
| <b>Figure S18.</b> The IR spectrum of compound <b>3</b> .....                  | 13 |
| <b>Figure S19.</b> The HR-ESI-MS spectrum of compound <b>3</b> .....           | 14 |
| <b>Figure S20.</b> The <sup>1</sup> H-NMR spectrum of compound <b>3</b> .....  | 14 |
| <b>Figure S21.</b> The <sup>13</sup> C-NMR spectrum of compound <b>3</b> ..... | 15 |
| <b>Figure S22.</b> The HSQC spectrum of compound <b>3</b> .....                | 15 |
| <b>Figure S23.</b> The HMBC spectrum of compound <b>3</b> .....                | 16 |
| <b>Figure S24.</b> The NOESY spectrum of compound <b>3</b> .....               | 16 |
| 4. The spectra of penicillone D ( <b>4</b> ) .....                             | 17 |

|                                                                                 |    |
|---------------------------------------------------------------------------------|----|
| <b>Figure S25.</b> The UV spectrum of compound <b>4</b> .....                   | 17 |
| <b>Figure S26.</b> The IR spectrum of compound <b>4</b> .....                   | 17 |
| <b>Figure S27.</b> The HR-ESI-MS spectrum of compound <b>4</b> .....            | 18 |
| <b>Figure S28.</b> The <sup>1</sup> H-NMR spectrum of compound <b>4</b> .....   | 18 |
| <b>Figure S29.</b> The <sup>13</sup> C-NMR spectrum of compound <b>4</b> .....  | 19 |
| <b>Figure S30.</b> The HSQC spectrum of compound <b>4</b> .....                 | 19 |
| <b>Figure S31.</b> The HMBC spectrum of compound <b>4</b> .....                 | 20 |
| <b>Figure S32.</b> The NOESY spectrum of compound <b>4</b> .....                | 20 |
| 5. The spectra of compound <b>5</b> .....                                       | 21 |
| <b>Figure S33.</b> The <sup>1</sup> H-NMR spectrum of compound <b>5</b> .....   | 21 |
| <b>Figure S34.</b> The <sup>13</sup> C-NMR spectrum of compound <b>5</b> .....  | 21 |
| 6. The spectra of compound <b>6</b> .....                                       | 22 |
| <b>Figure S35.</b> The <sup>1</sup> H-NMR spectrum of compound <b>6</b> .....   | 22 |
| <b>Figure S36.</b> The <sup>13</sup> C-NMR spectrum of compound <b>6</b> .....  | 22 |
| 7. The spectra of compound <b>7</b> .....                                       | 23 |
| <b>Figure S37.</b> The <sup>1</sup> H-NMR spectrum of compound <b>7</b> .....   | 23 |
| <b>Figure S38.</b> The <sup>13</sup> C-NMR spectrum of compound <b>7</b> .....  | 23 |
| 8. The spectra of compound <b>8</b> .....                                       | 24 |
| <b>Figure S39.</b> The <sup>1</sup> H-NMR spectrum of compound <b>8</b> .....   | 24 |
| <b>Figure S40.</b> The <sup>13</sup> C-NMR spectrum of compound <b>8</b> .....  | 24 |
| 9. The spectra of compound <b>9</b> .....                                       | 25 |
| <b>Figure S41.</b> The <sup>1</sup> H-NMR spectrum of compound <b>9</b> .....   | 25 |
| <b>Figure S42.</b> The <sup>13</sup> C-NMR spectrum of compound <b>9</b> .....  | 25 |
| 10. The spectra of compound <b>10</b> .....                                     | 26 |
| <b>Figure S43.</b> The <sup>1</sup> H-NMR spectrum of compound <b>10</b> .....  | 26 |
| <b>Figure S44.</b> The <sup>13</sup> C-NMR spectrum of compound <b>10</b> ..... | 26 |
| 11. The spectra of compound <b>11</b> .....                                     | 27 |
| <b>Figure S45.</b> The <sup>1</sup> H-NMR spectrum of compound <b>11</b> .....  | 27 |
| <b>Figure S46.</b> The <sup>13</sup> C-NMR spectrum of compound <b>11</b> ..... | 27 |
| 12. The spectra of compound <b>12</b> .....                                     | 28 |

|                                                                                  |    |
|----------------------------------------------------------------------------------|----|
| <b>Figure S47.</b> The $^1\text{H}$ -NMR spectrum of compound <b>12</b> .....    | 28 |
| <b>Figure S48.</b> The $^{13}\text{C}$ -NMR spectrum of compound <b>12</b> ..... | 28 |
| 13. The spectra of compound <b>13</b> .....                                      | 29 |
| <b>Figure S49.</b> The $^1\text{H}$ -NMR spectrum of compound <b>13</b> .....    | 29 |
| <b>Figure S50.</b> The $^{13}\text{C}$ -NMR spectrum of compound <b>13</b> ..... | 29 |
| 14. The spectra of compound <b>14</b> .....                                      | 30 |
| <b>Figure S51.</b> The $^1\text{H}$ -NMR spectrum of compound <b>14</b> .....    | 30 |
| <b>Figure S52.</b> The $^{13}\text{C}$ -NMR spectrum of compound <b>14</b> ..... | 30 |
| 15. The spectra of compound <b>15</b> .....                                      | 31 |
| <b>Figure S53.</b> The $^1\text{H}$ -NMR spectrum of compound <b>15</b> .....    | 31 |
| <b>Figure S54.</b> The $^{13}\text{C}$ -NMR spectrum of compound <b>15</b> ..... | 31 |
| 16. The spectra of compound <b>16</b> .....                                      | 32 |
| <b>Figure S55.</b> The $^1\text{H}$ -NMR spectrum of compound <b>16</b> .....    | 32 |
| <b>Figure S56.</b> The $^{13}\text{C}$ -NMR spectrum of compound <b>16</b> ..... | 32 |

# 1. The spectra of penicillone A (1)

Figure S1. The UV spectrum of compound 1

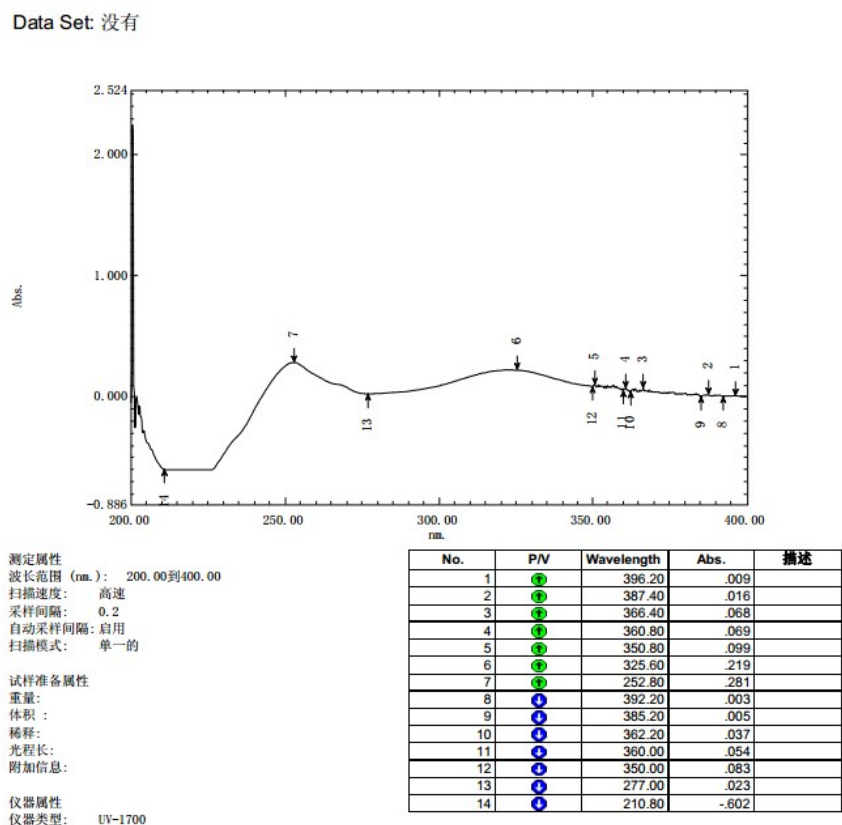

Figure S2. The IR spectrum of compound 1

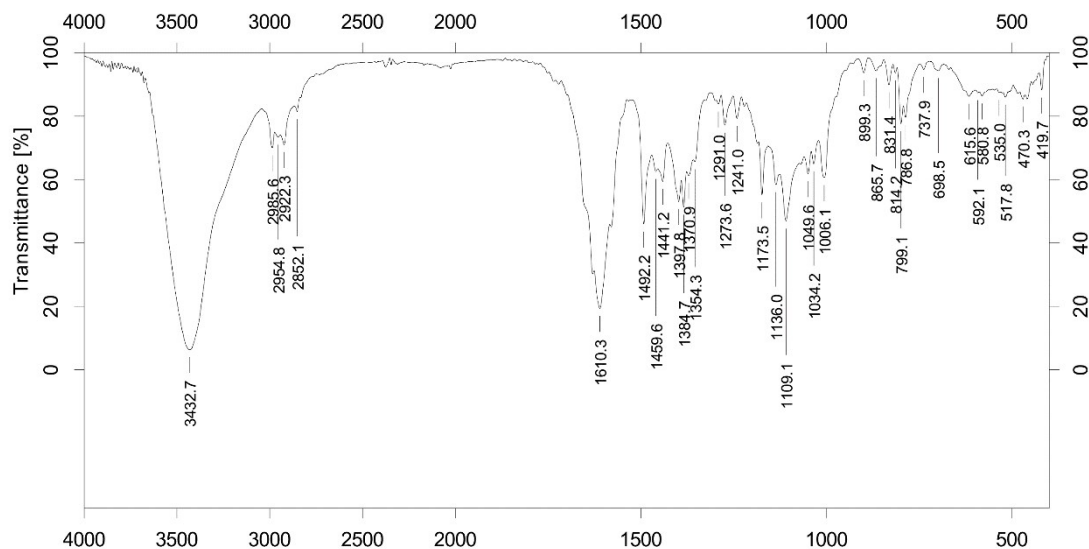

Figure S3. The HR-ESI-MS spectrum of compound 1

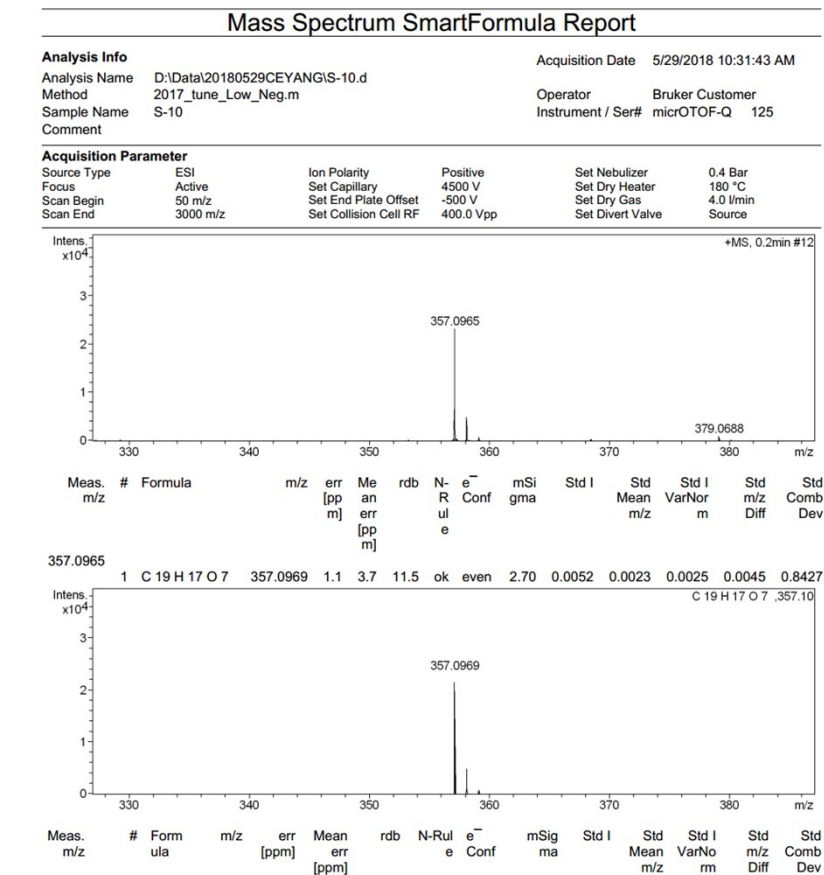

Figure S4. The <sup>1</sup>H-NMR spectrum of compound 1

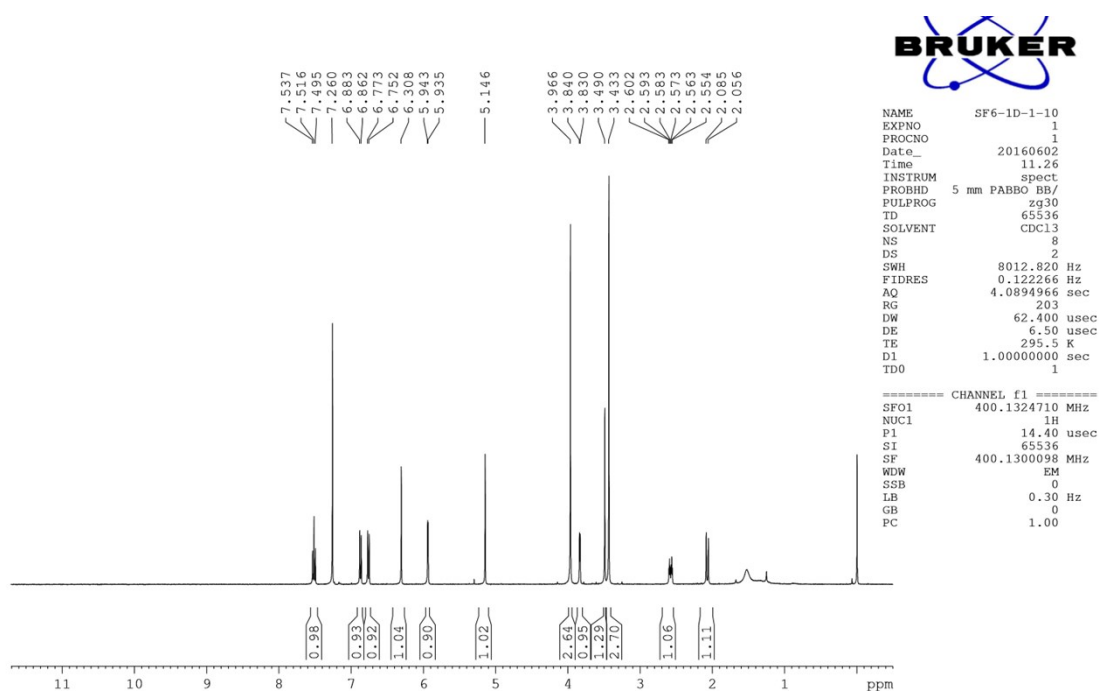

Figure S5. The <sup>13</sup>C-NMR spectrum of compound 1

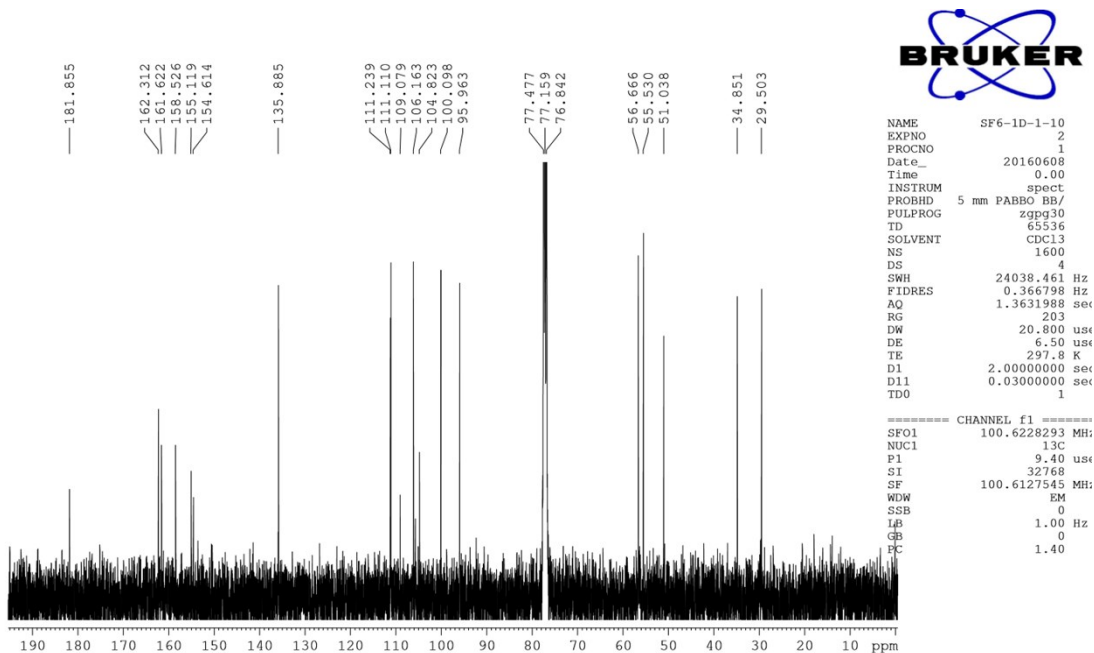

Figure S6. The HSQC spectrum of compound 1

AV-600-HSQC  
Sample:SF6-1D-1-10

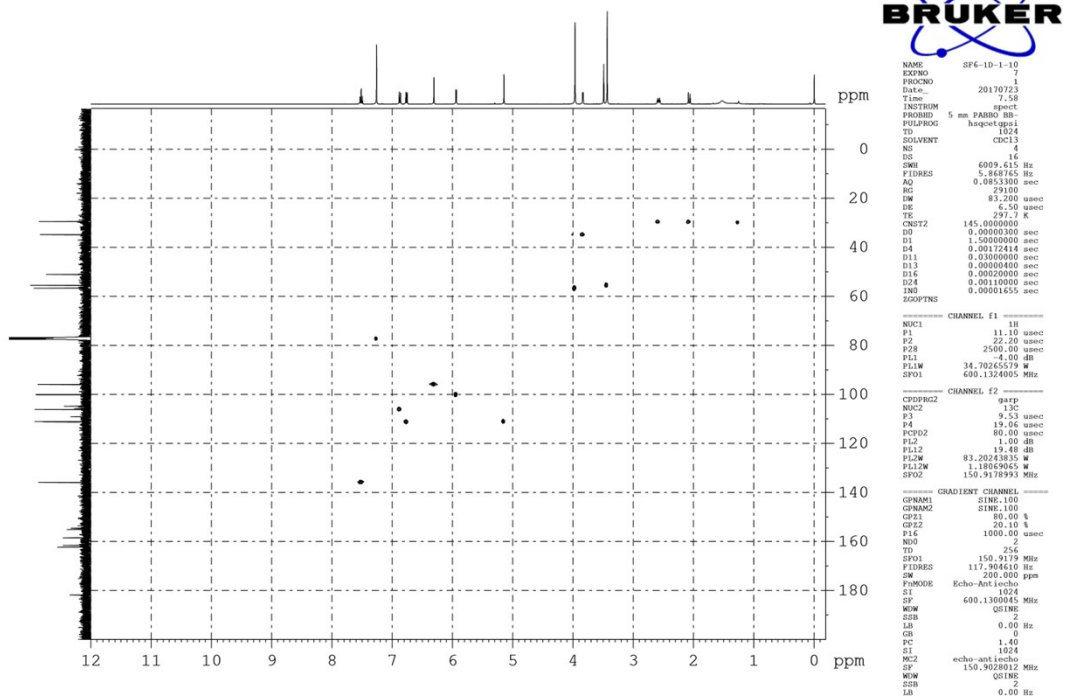

Figure S7. The HMBC spectrum of compound 1

AV-600-HMBC  
Sample:SF6-1D-1-10

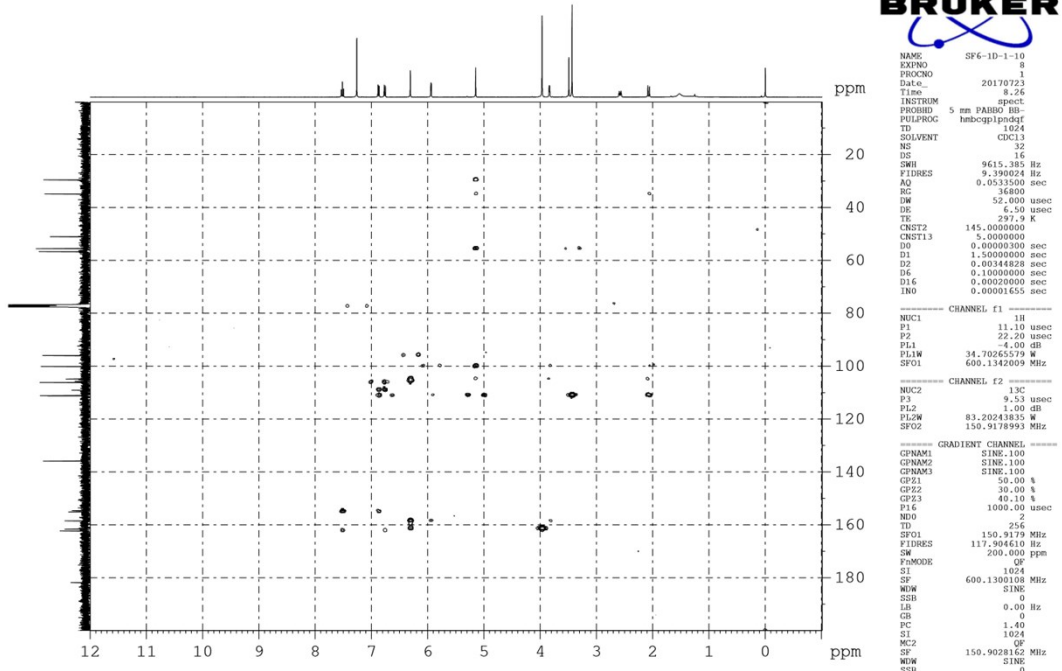

Figure S8. The NOESY spectrum of compound 1

AV-600-NOESY  
Sample:SF6-1D-1-10

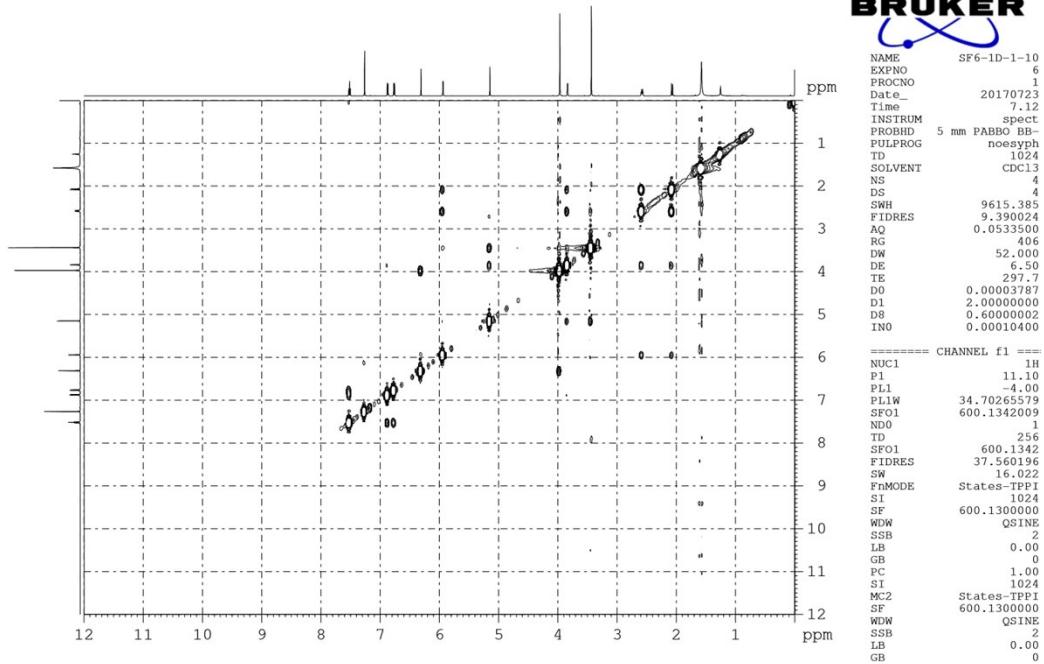



## 2. The spectra of penicillone B (2)

Figure S9. The UV spectrum of compound 2

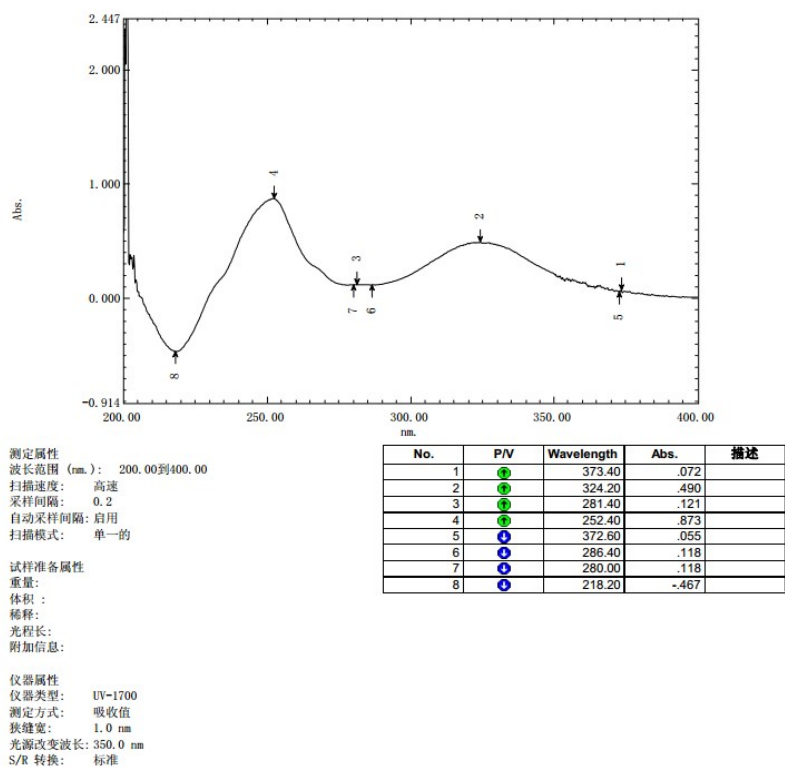

Figure S10. The IR spectrum of compound 2

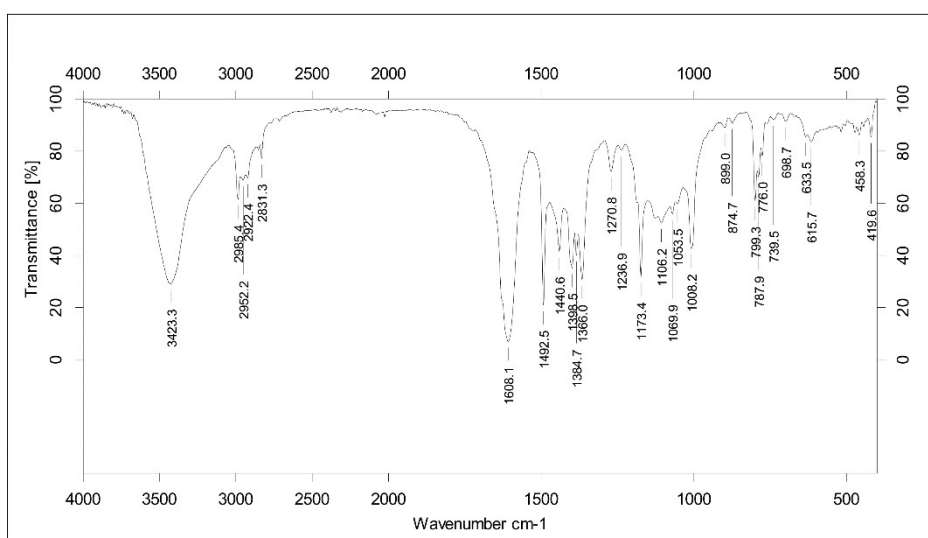

Figure S11. The HR-ESI-MS spectrum of compound 2

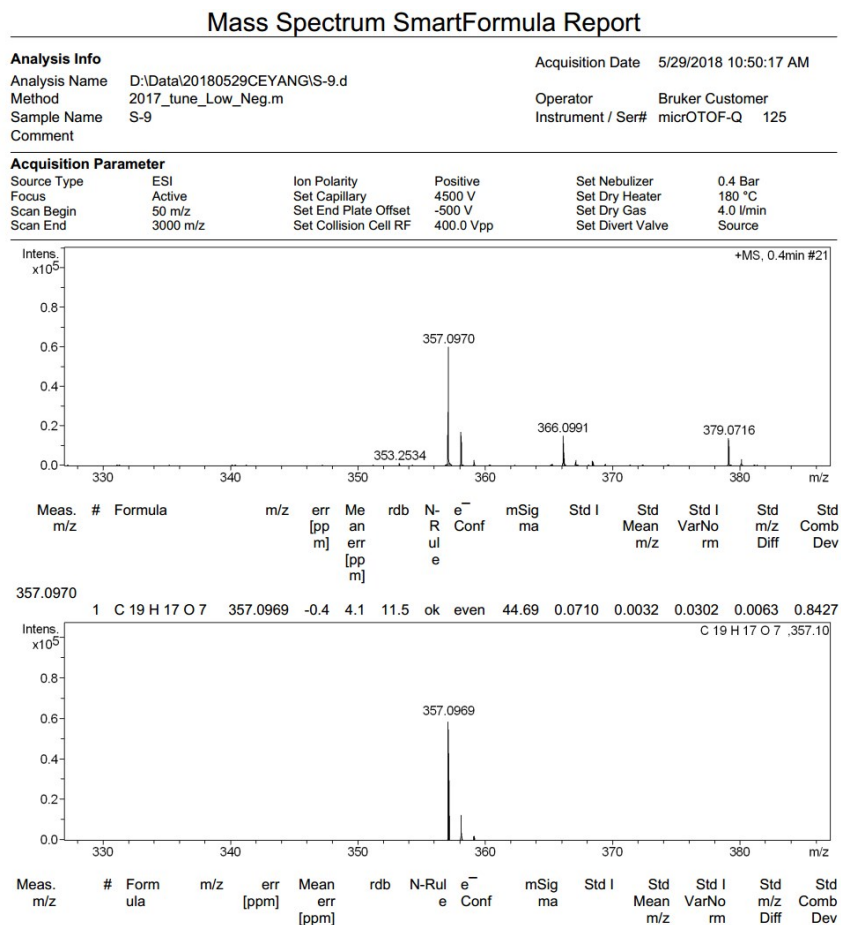

Figure S12. The <sup>1</sup>H-NMR spectrum of compound 2

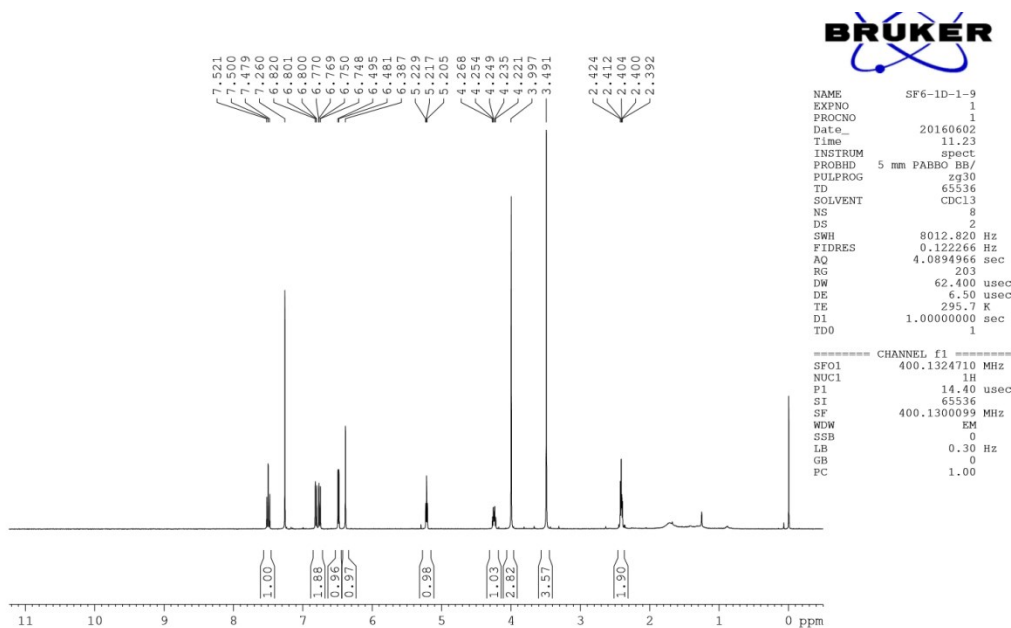

Figure S13. The <sup>13</sup>C-NMR spectrum of compound 2

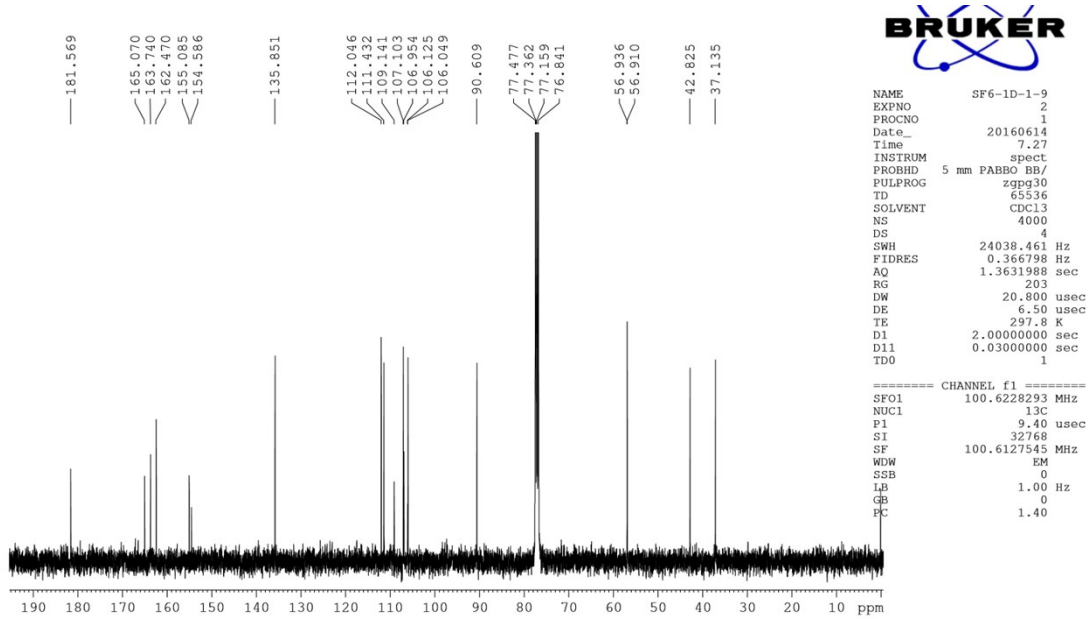

Figure S14. The HSQC spectrum of compound 2

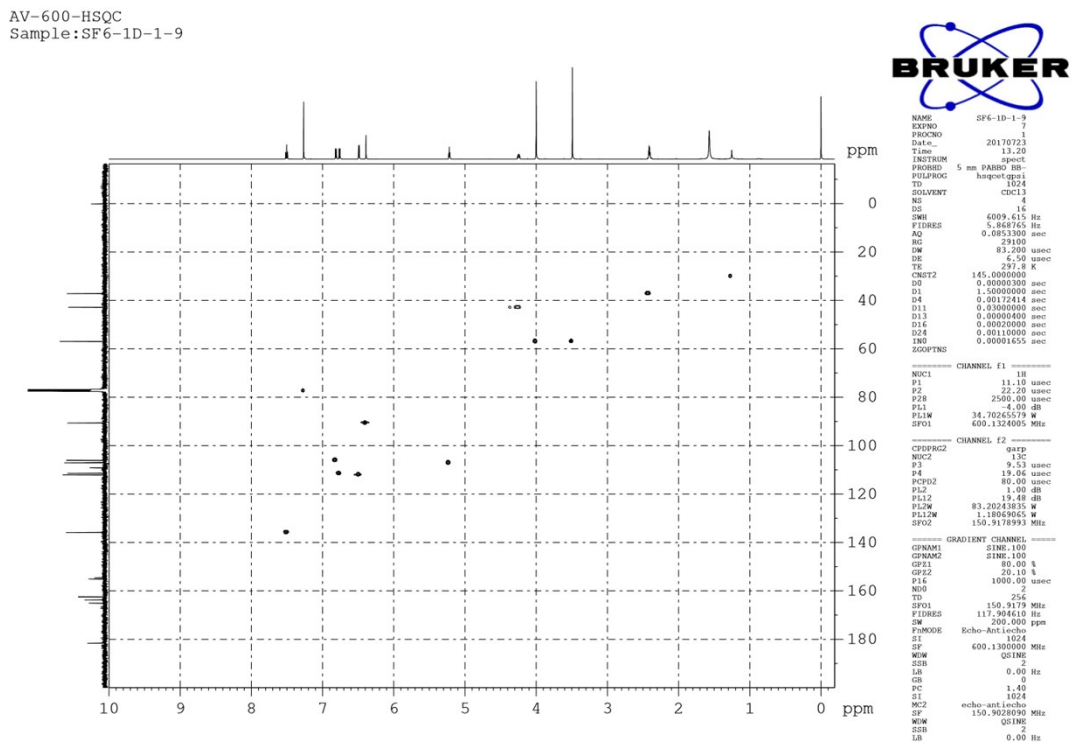

Figure S15. The HMBC spectrum of compound 2

AV-600-HMBC  
Sample:SF6-1D-1-9

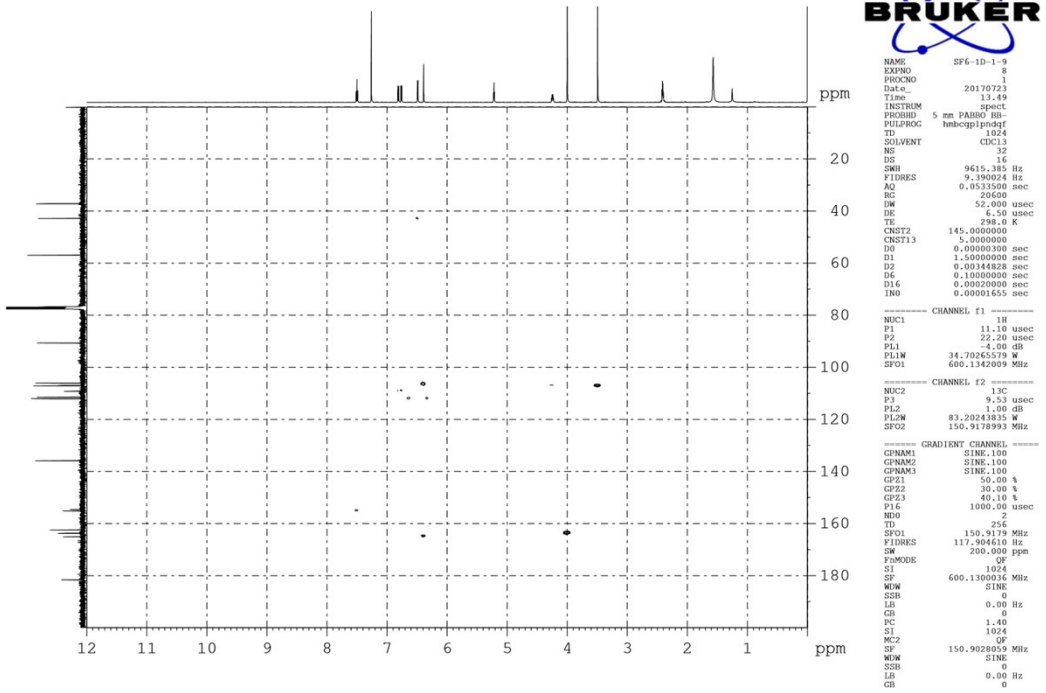

Figure S16. The NOESY spectrum of compound 2

AV-600-NOESY  
Sample:SF6-1D-1-9

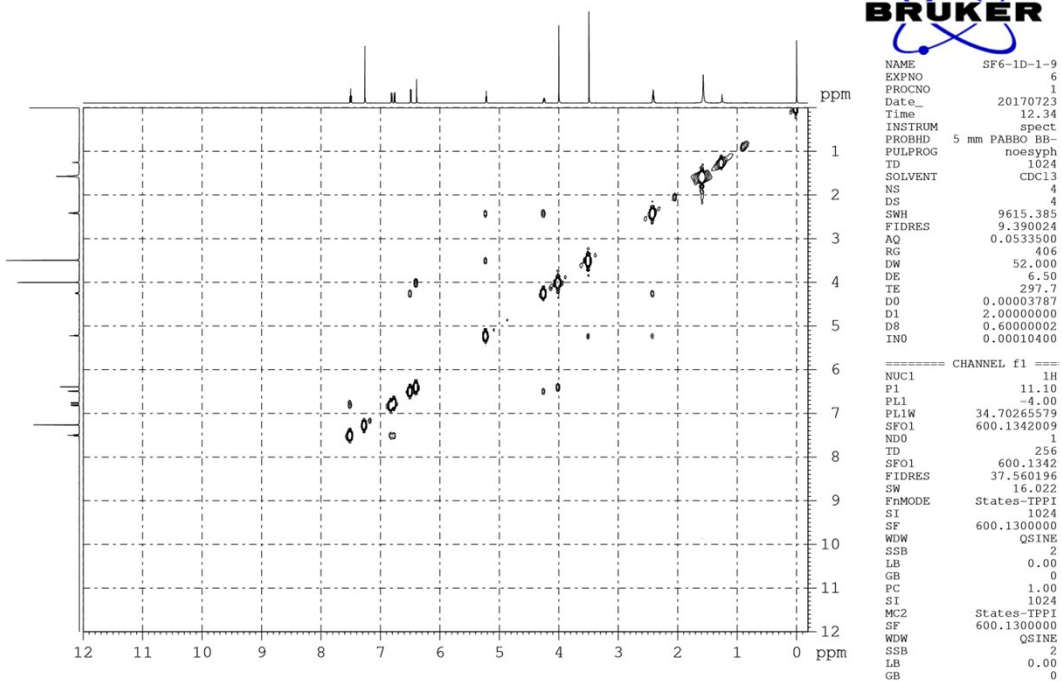

### 3. The spectra of penicillone C (3)

Figure S17. The UV spectrum of compound 3

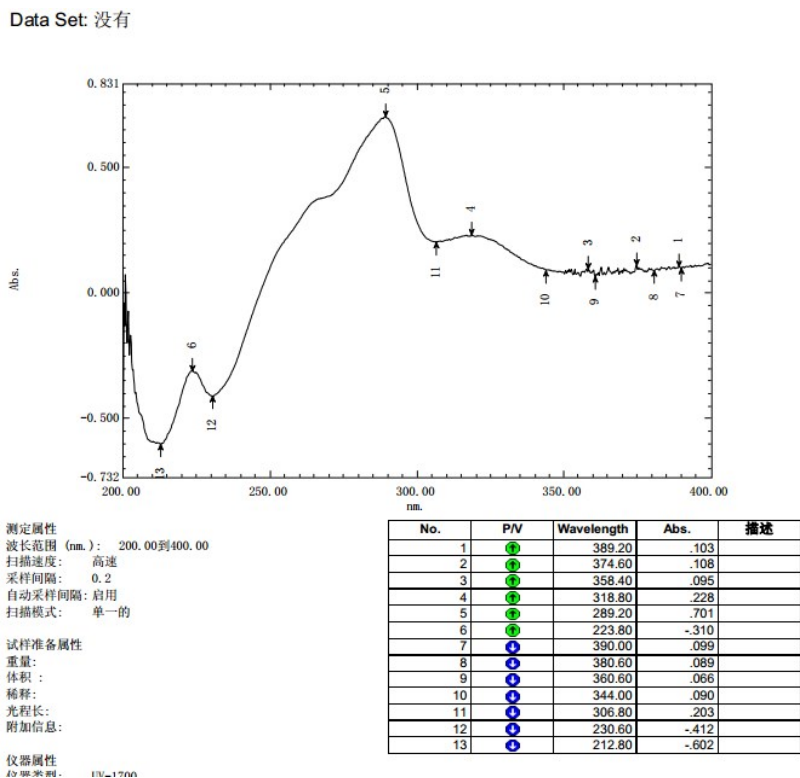

Figure S18. The IR spectrum of compound 3

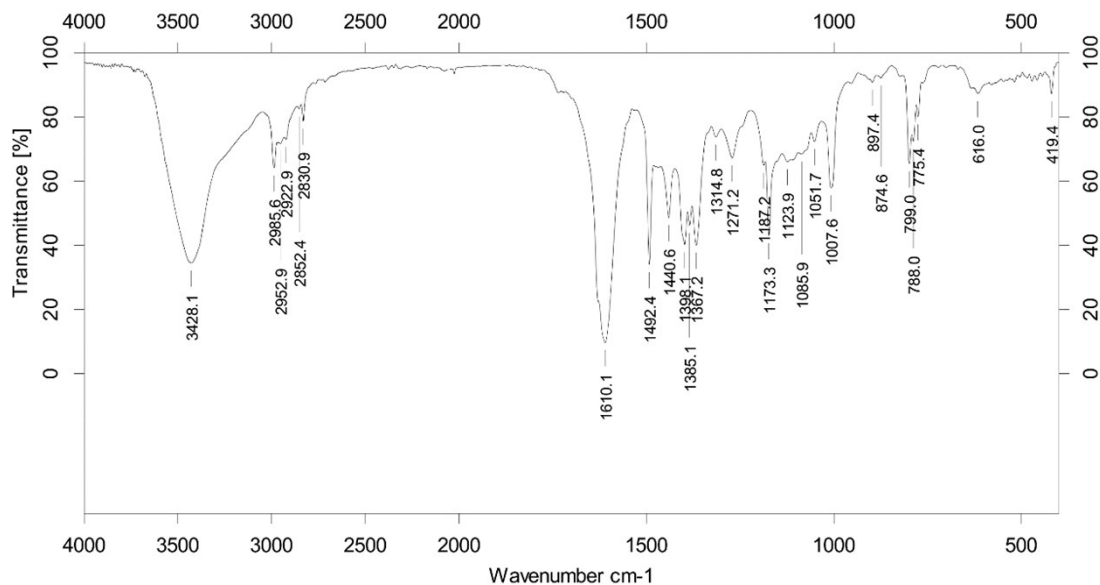

Figure S19. The HR-ESI-MS spectrum of compound 3

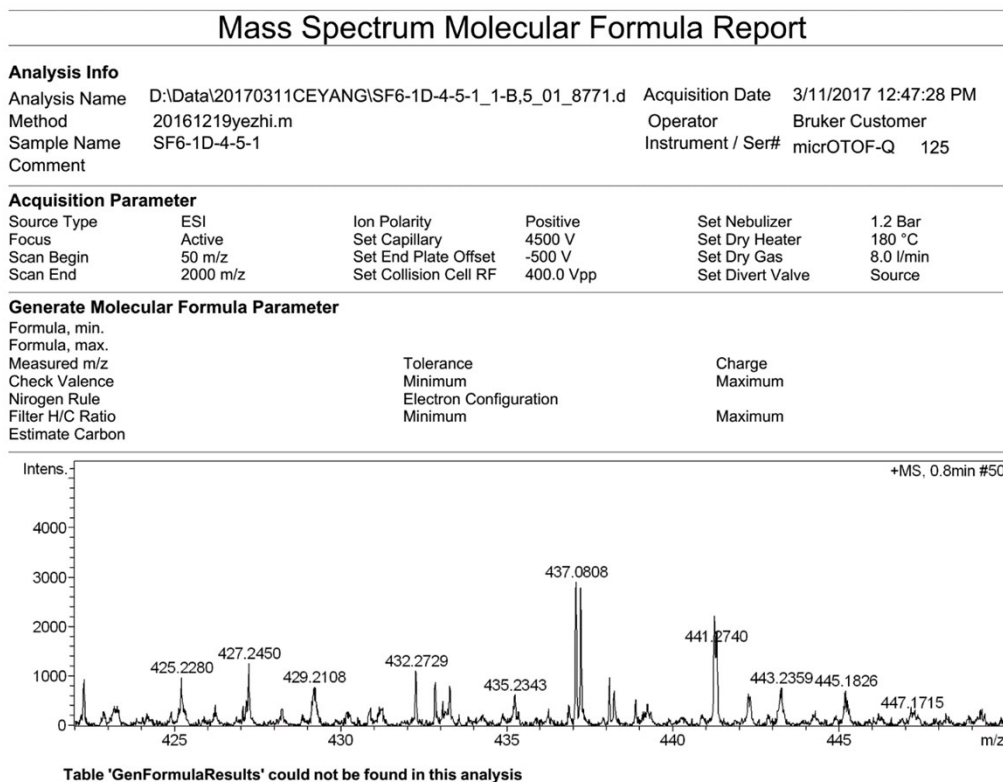

Figure S20. The <sup>1</sup>H-NMR spectrum of compound 3

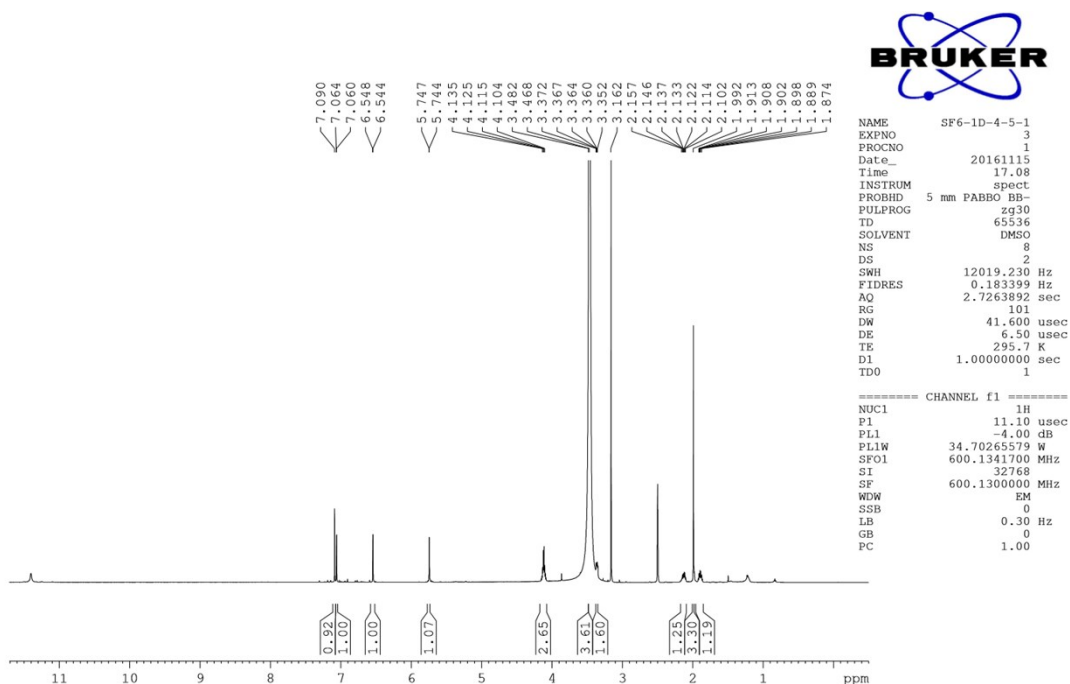

Figure S21. The  $^{13}\text{C}$ -NMR spectrum of compound 3

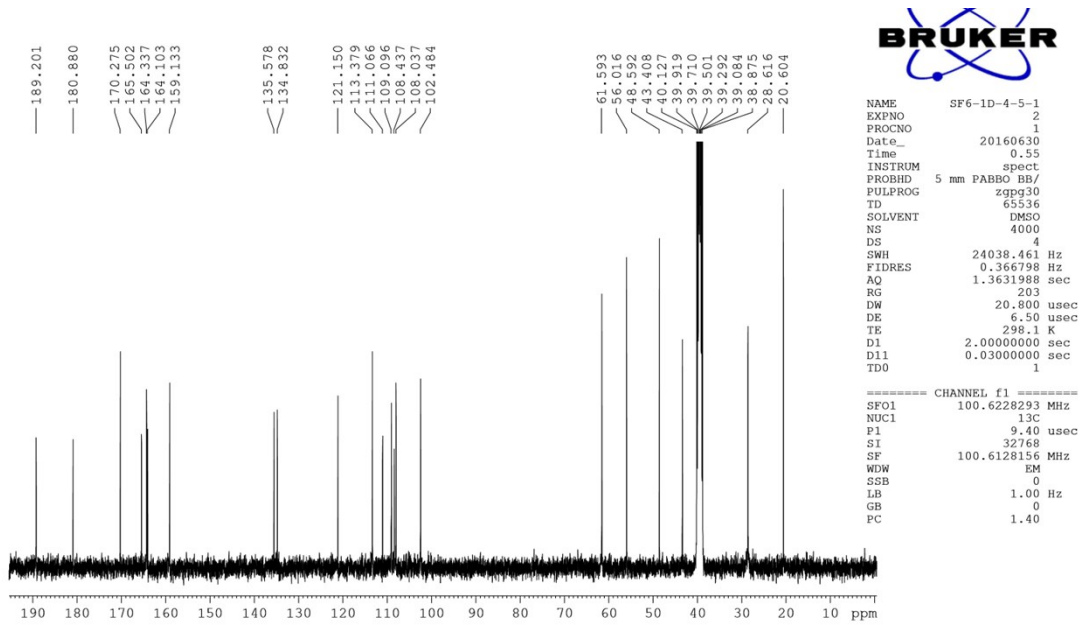

Figure S22. The HSQC spectrum of compound 3

Sample:

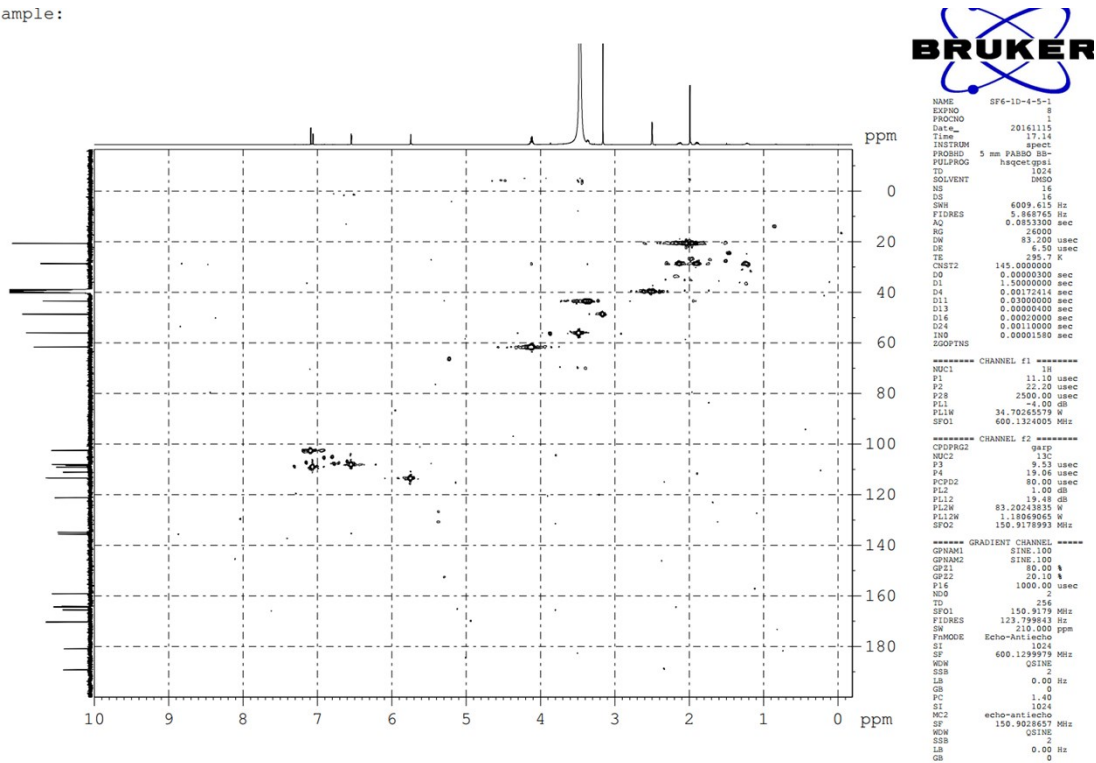

Figure S23. The HMBC spectrum of compound 3

AV-600-HMBC  
Sample:

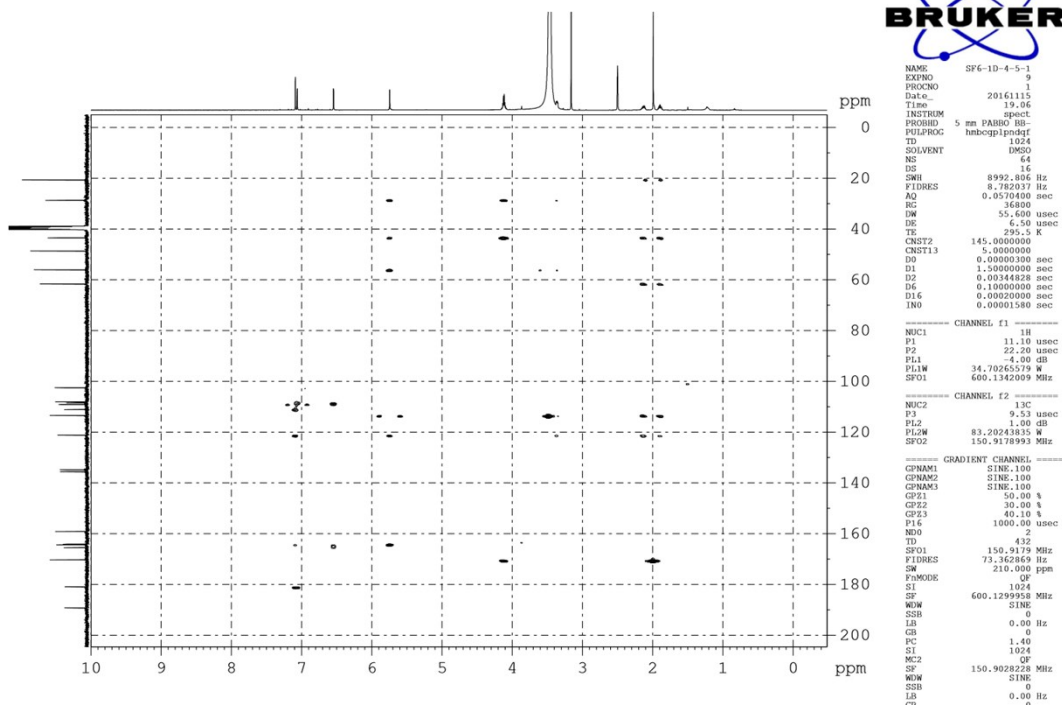

Figure S24. The NOESY spectrum of compound 3

AV-600-NOESY  
Sample:

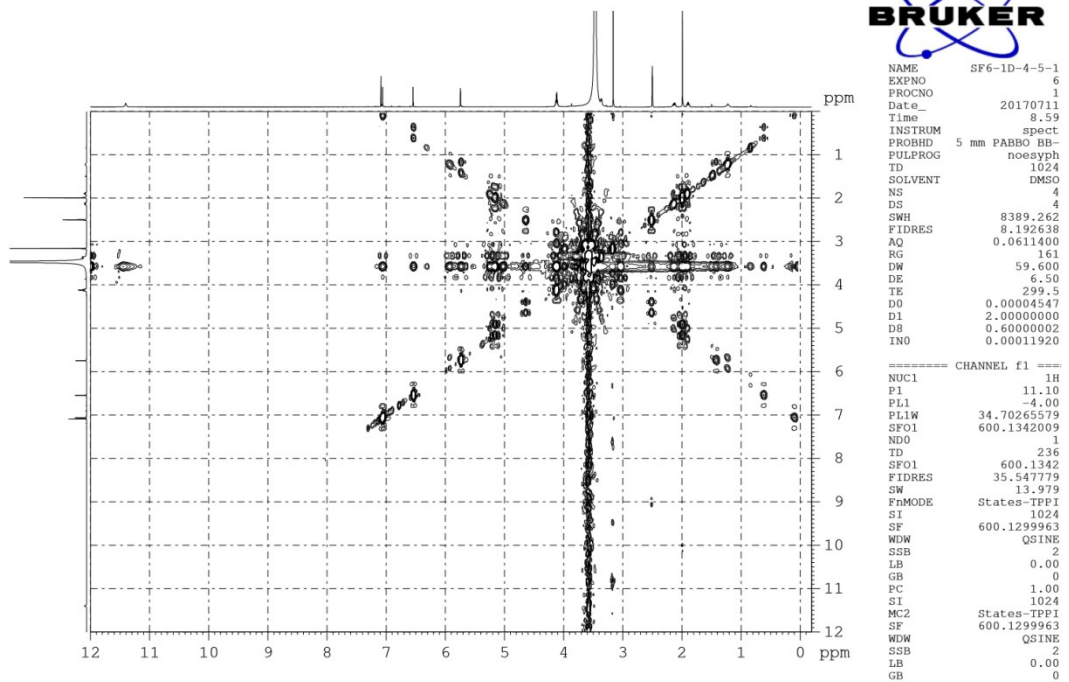



## 4. The spectra of penicillone D (4)

Figure S25. The UV spectrum of compound 4

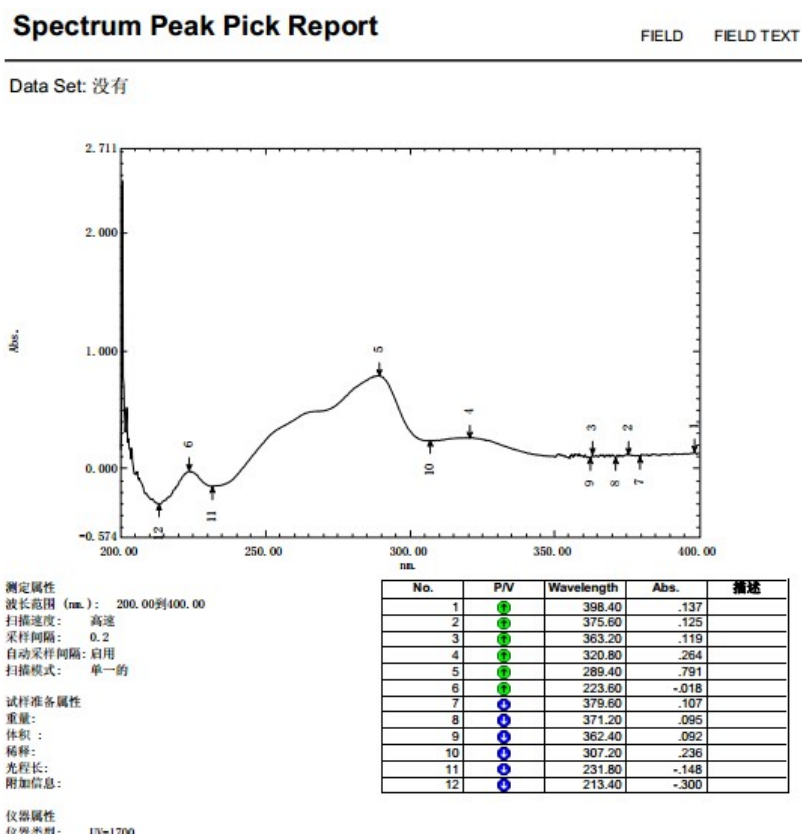

Figure S26. The IR spectrum of compound 4

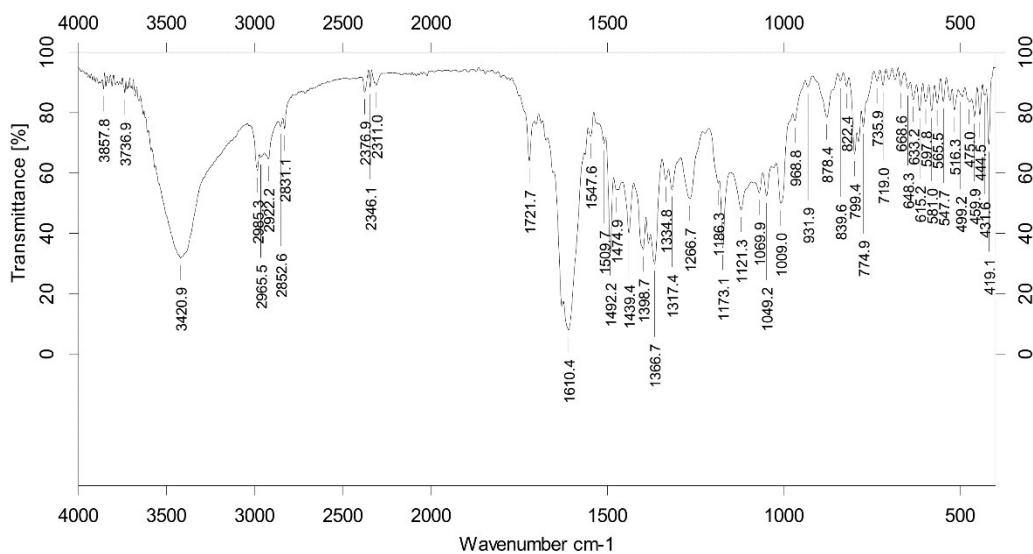

Figure S27. The HR-ESI-MS spectrum of compound 4

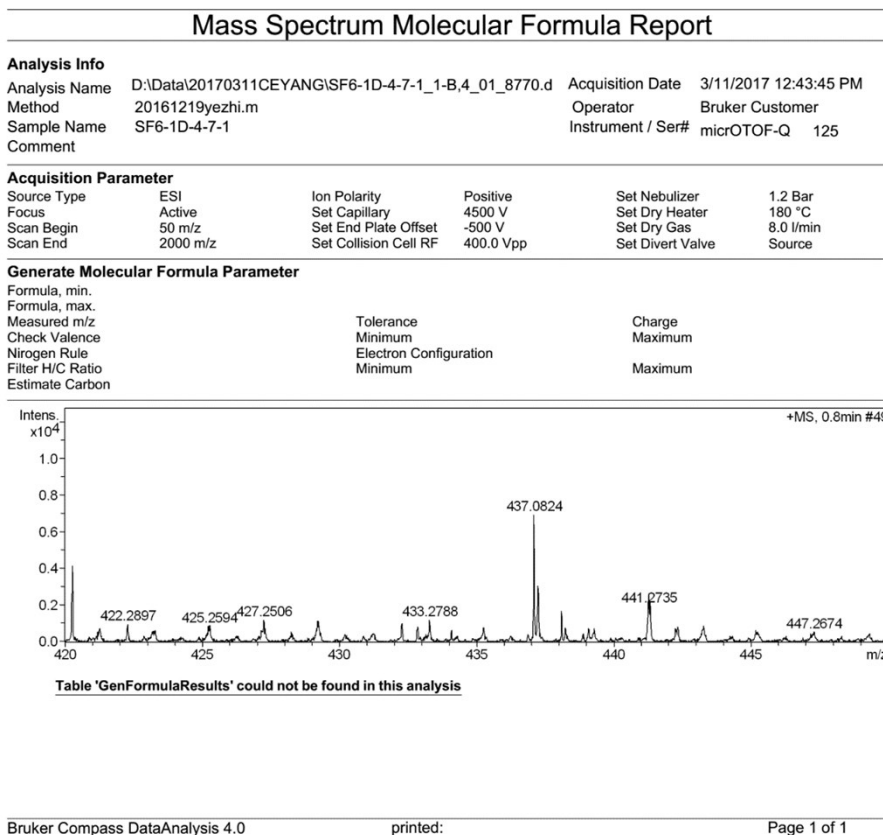

Figure S28. The <sup>1</sup>H-NMR spectrum of compound 4

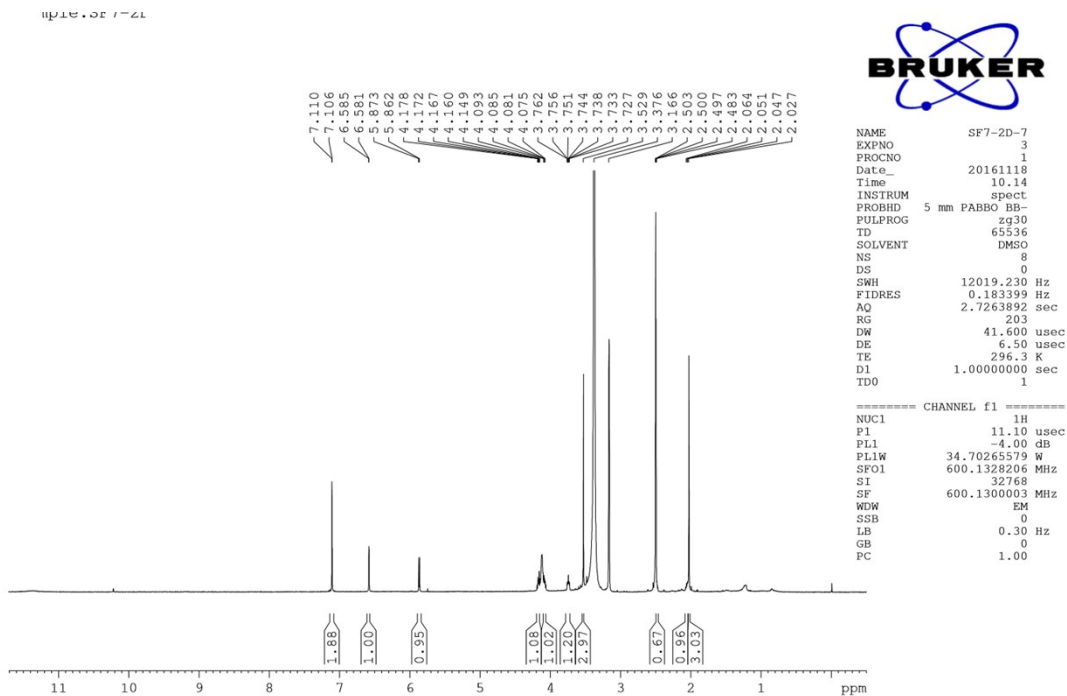

Figure S29. The  $^{13}\text{C}$ -NMR spectrum of compound 4

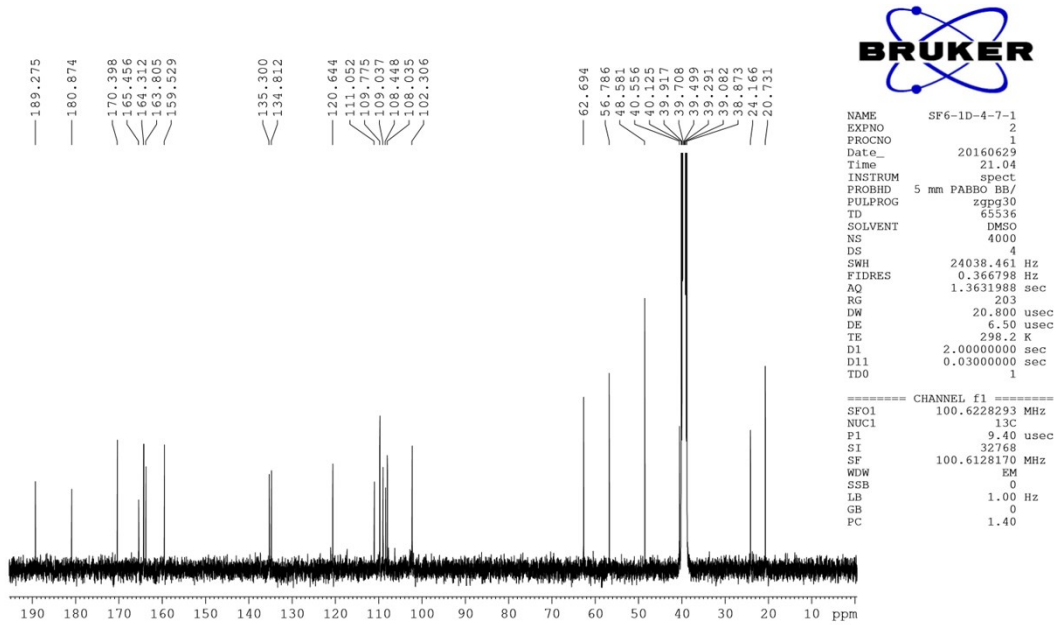

Figure S30. The HSQC spectrum of compound 4

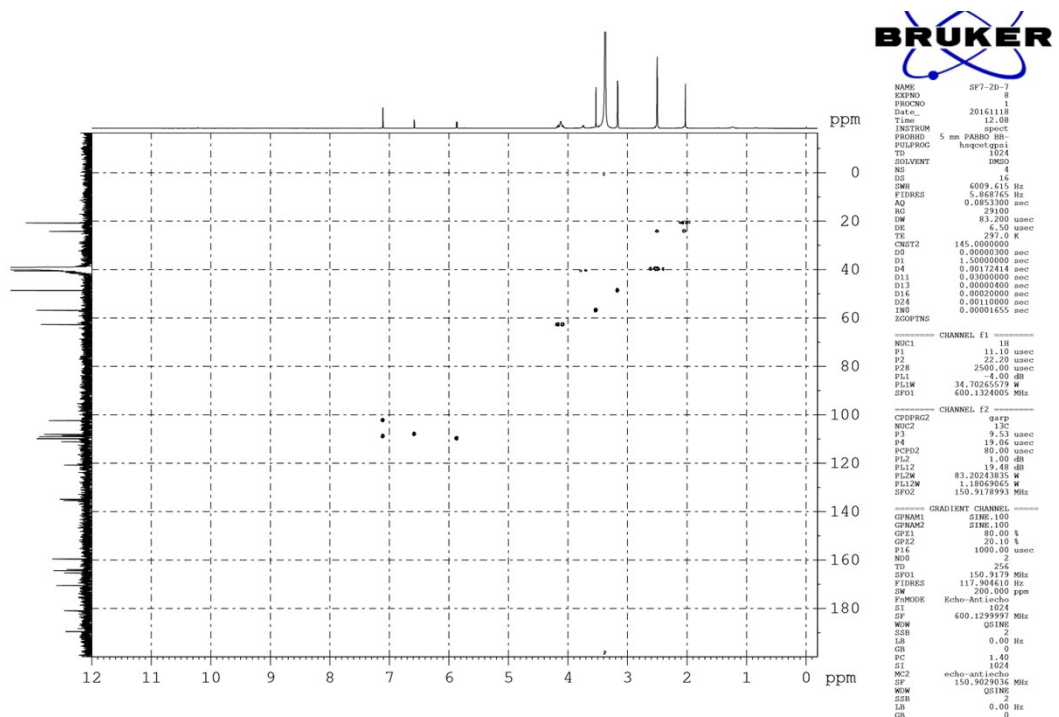

Figure S31. The HMBC spectrum of compound 4

AV-600-HMBC  
Sample:SF7-2D-7

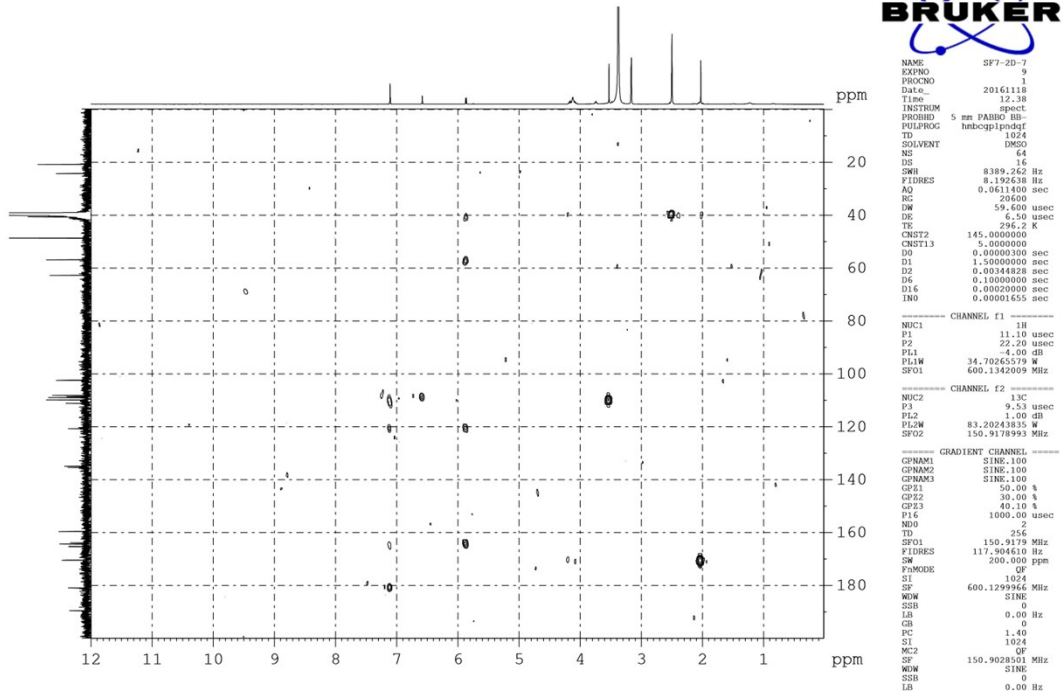

Figure S32. The NOESY spectrum of compound 4

AV-600-NOESY  
Sample:

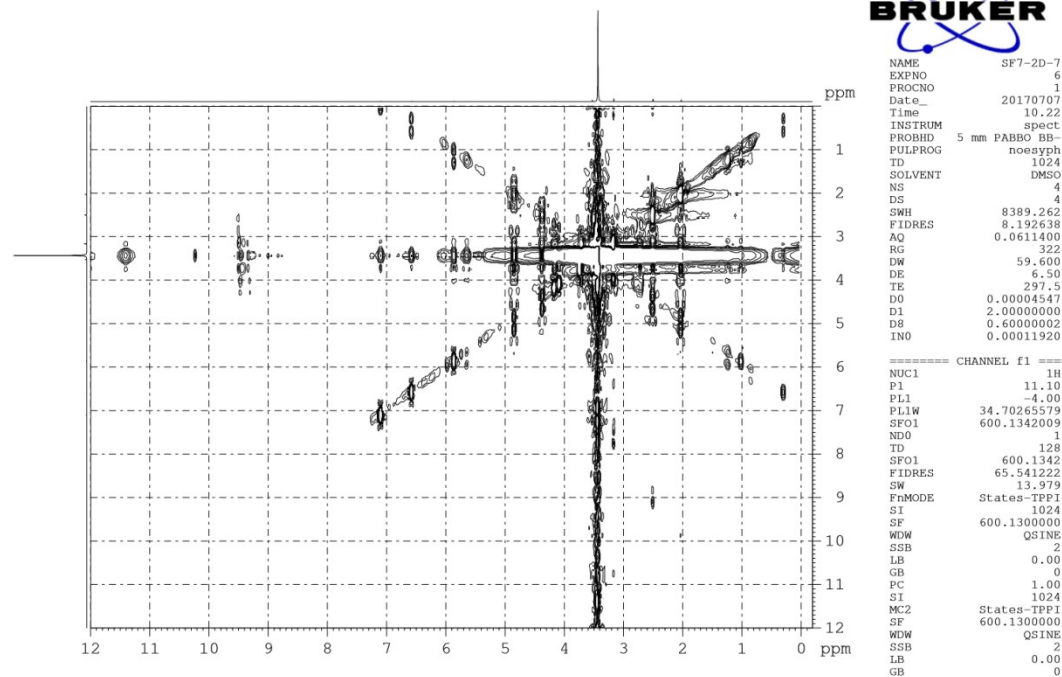

## 5. The spectra of compound 5

Figure S33. The  $^1\text{H-NMR}$  spectrum of compound 5

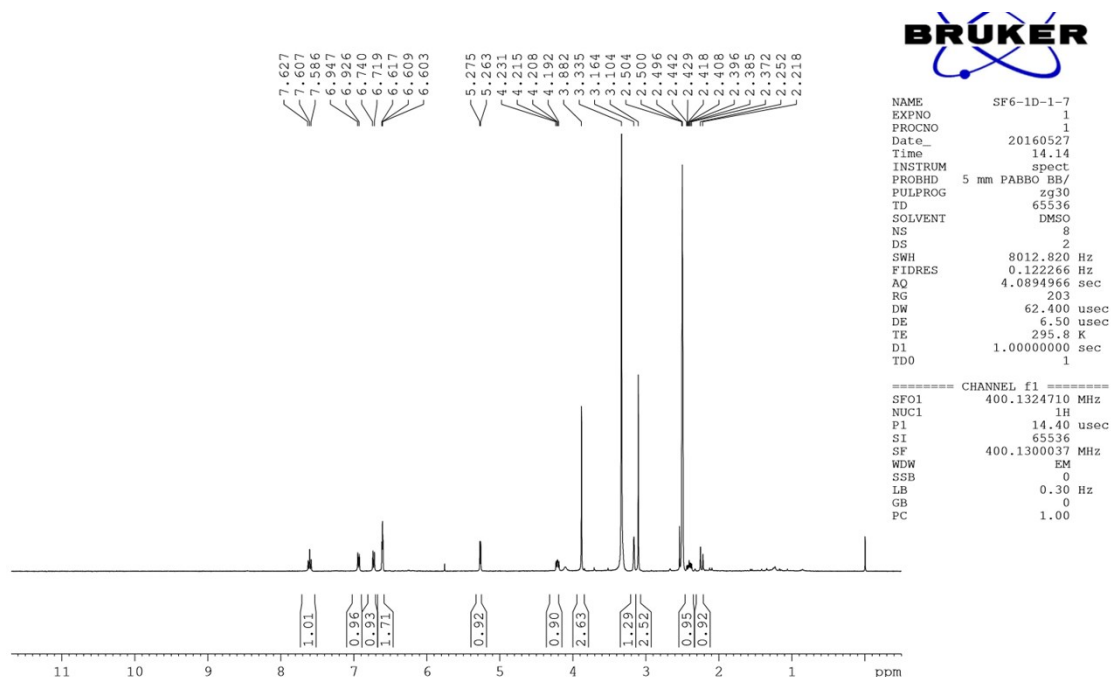

Figure S34. The  $^{13}\text{C-NMR}$  spectrum of compound 5

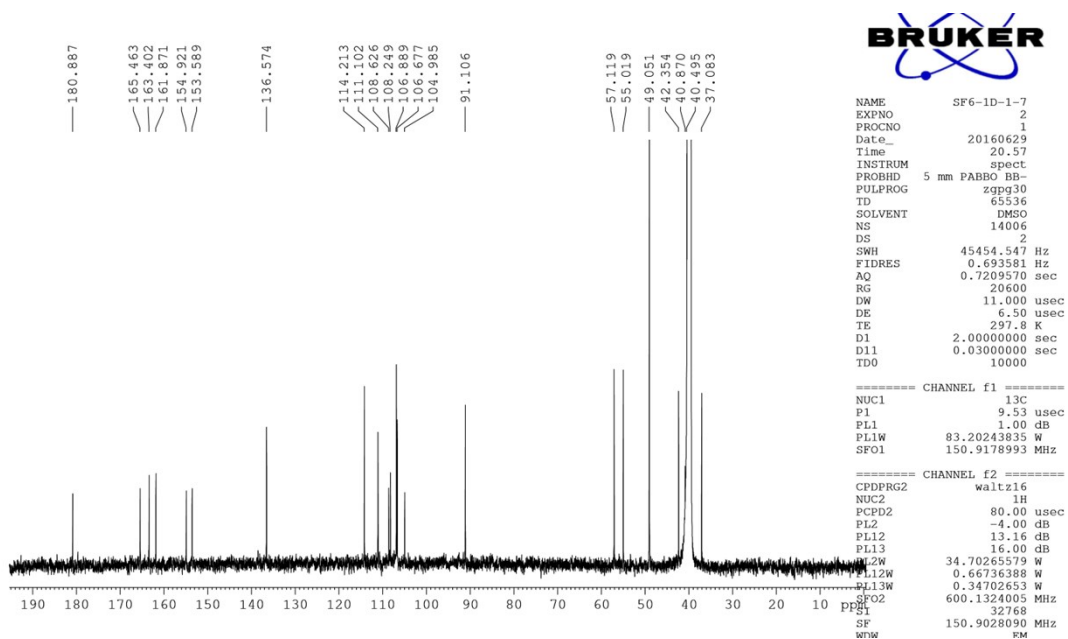

## 6. The spectra of compound 6

Figure S35. The  $^1\text{H-NMR}$  spectrum of compound 6

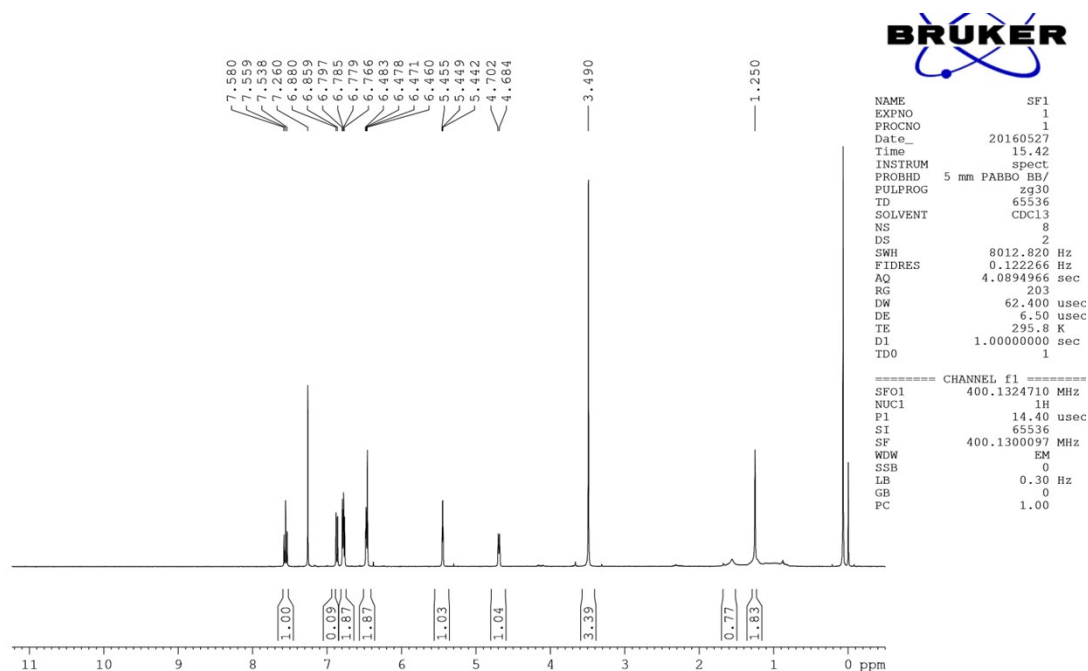

Figure S36. The  $^{13}\text{C-NMR}$  spectrum of compound 6

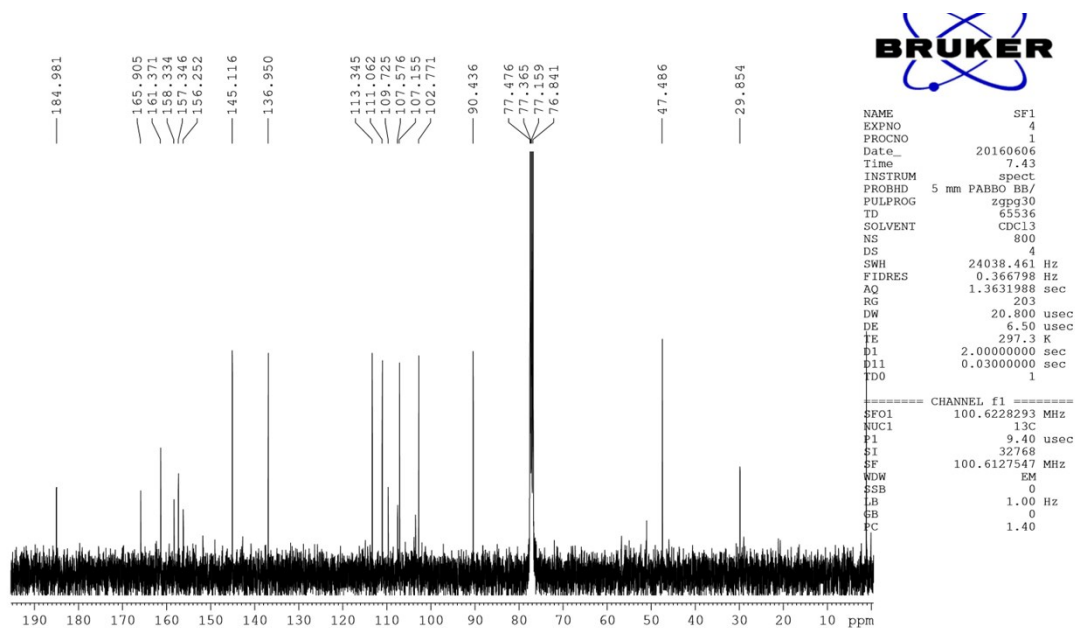

## 7. The spectra of compound 7

Figure S37. The  $^1\text{H-NMR}$  spectrum of compound 7

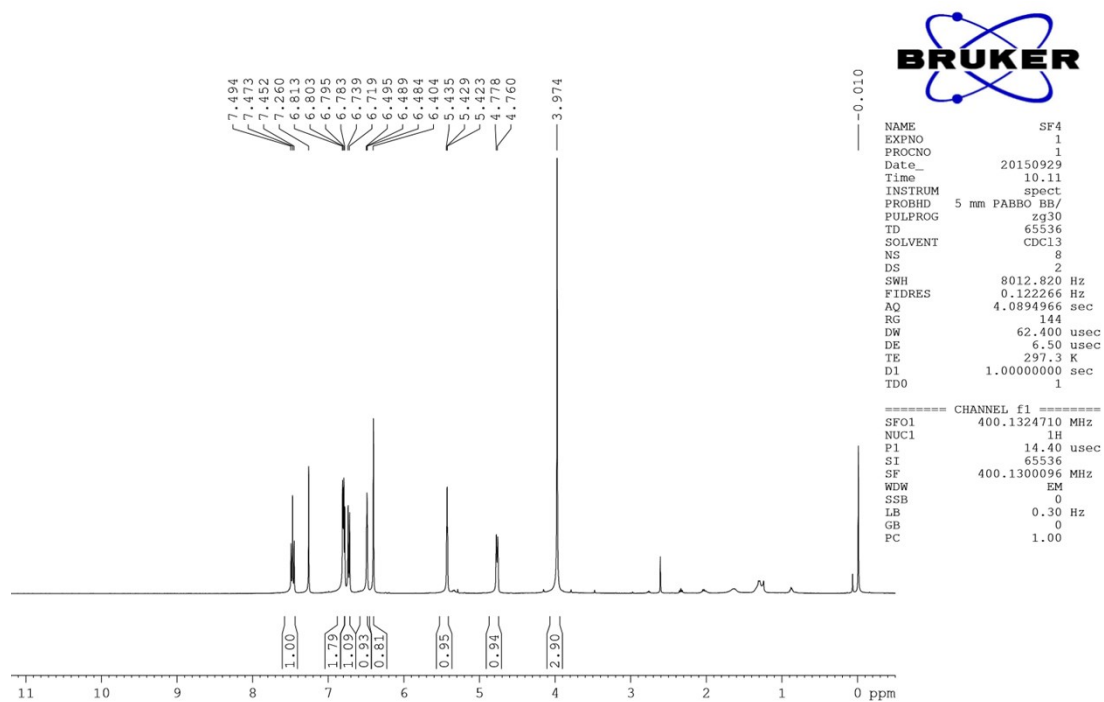

Figure S38. The  $^{13}\text{C-NMR}$  spectrum of compound 7

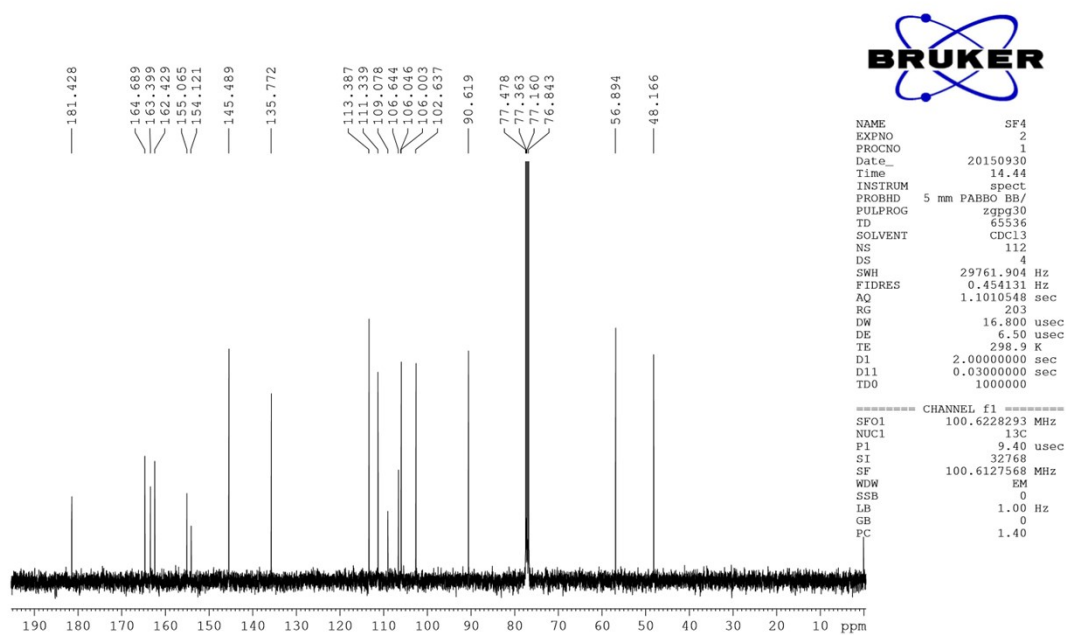

## 8. The spectra of compound 8

Figure S39. The  $^1\text{H-NMR}$  spectrum of compound 8

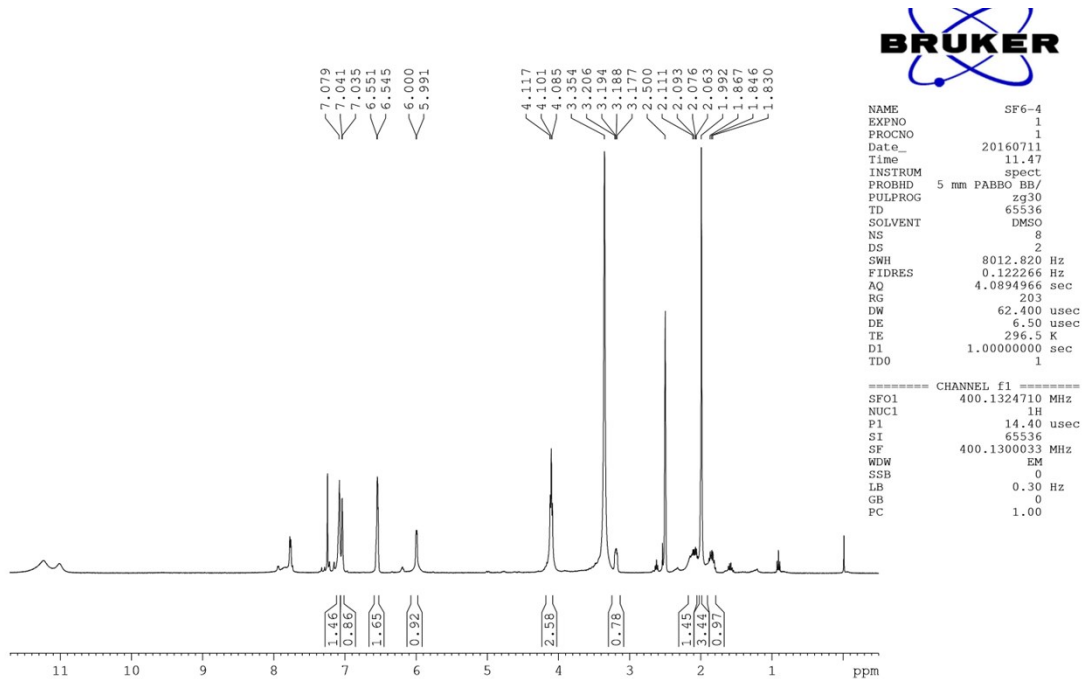

Figure S40. The  $^{13}\text{C-NMR}$  spectrum of compound 8

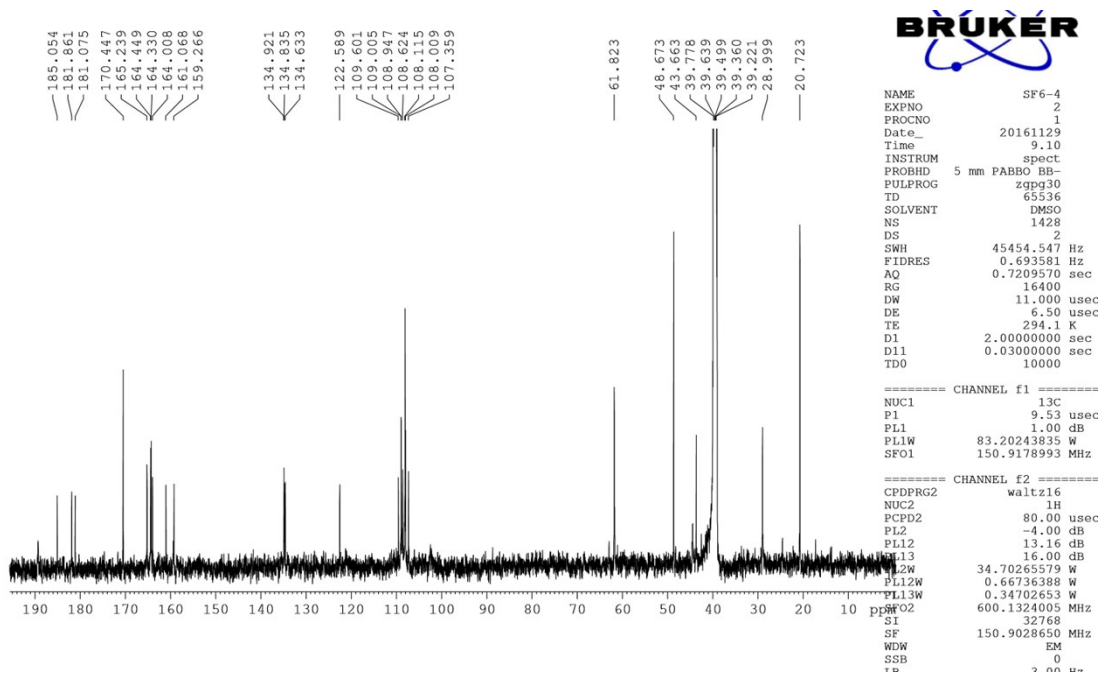



## 9. The spectra of compound 9

Figure S41. The  $^1\text{H-NMR}$  spectrum of compound 9

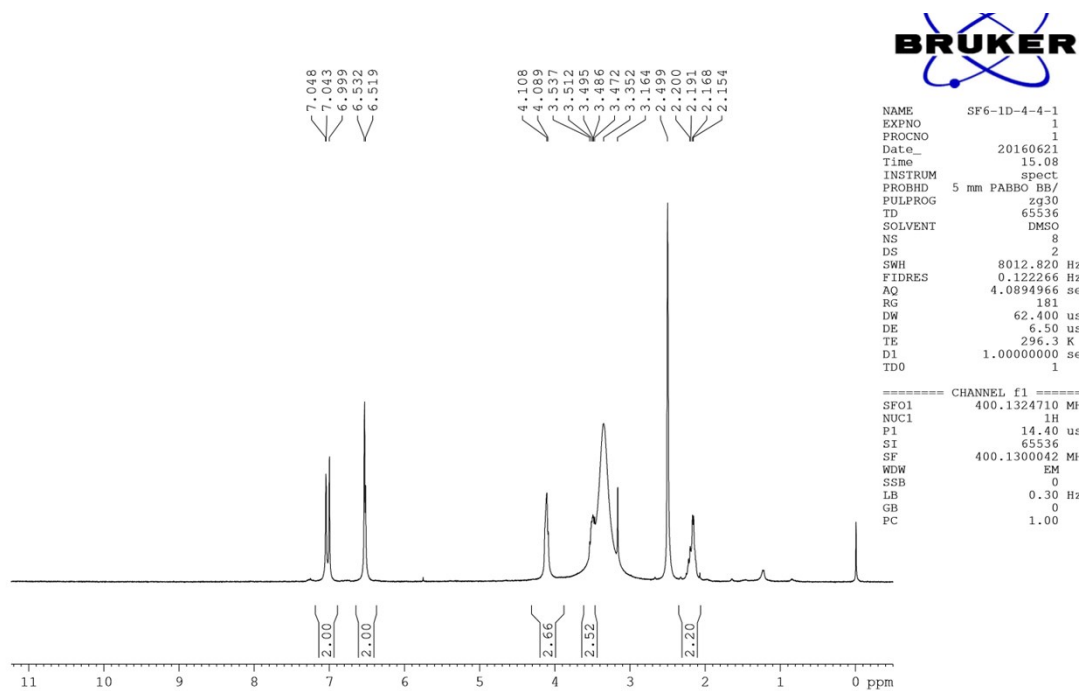

Figure S42. The  $^{13}\text{C-NMR}$  spectrum of compound 9

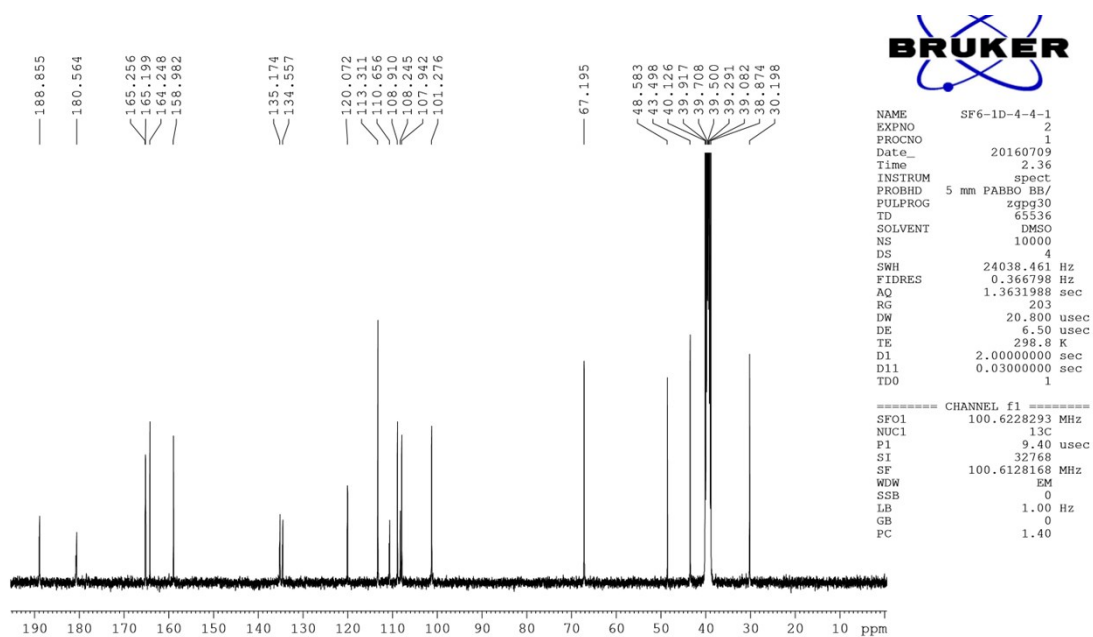

## 10. The spectra of compound 10

Figure S43. The  $^1\text{H}$ -NMR spectrum of compound 10

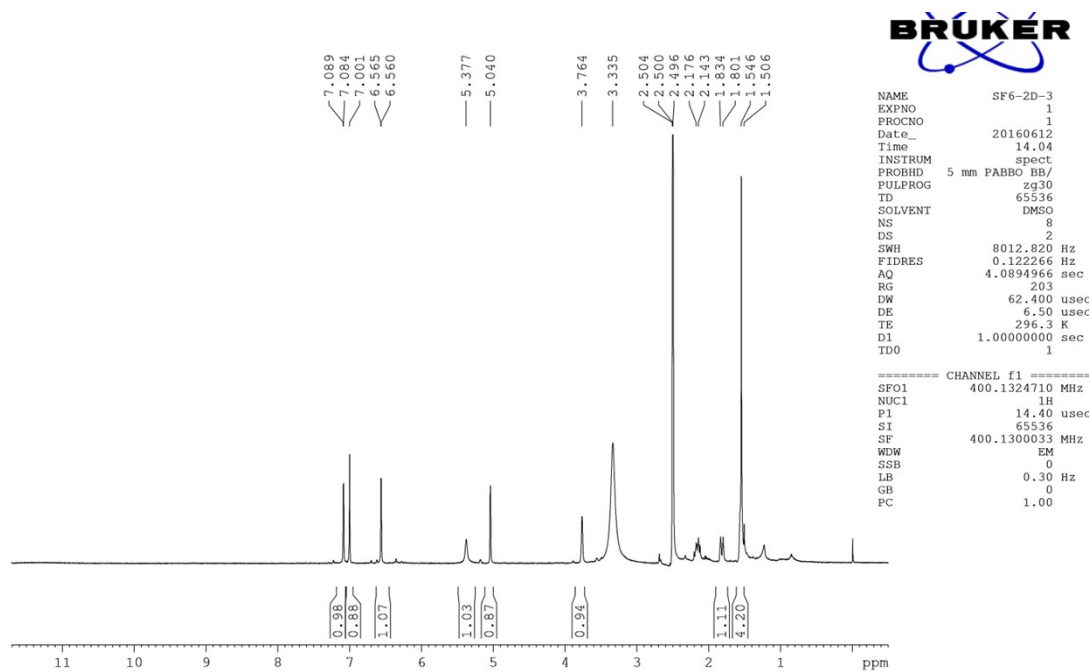

Figure S44. The  $^{13}\text{C}$ -NMR spectrum of compound 10

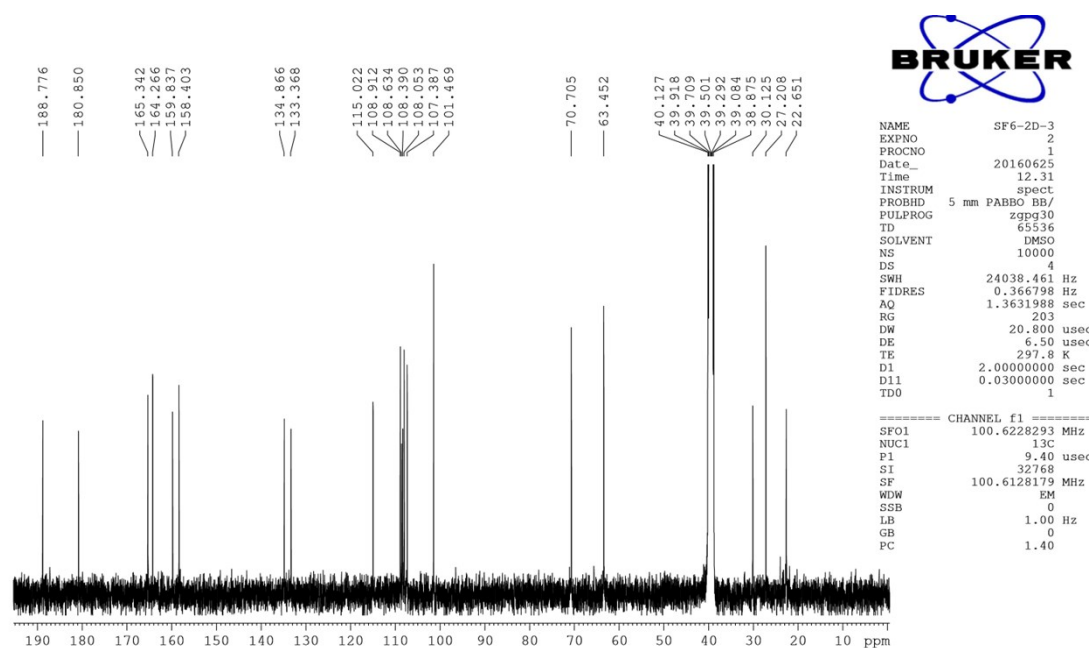

# 11. The spectra of compound 11

Figure S45. The <sup>1</sup>H-NMR spectrum of compound 11

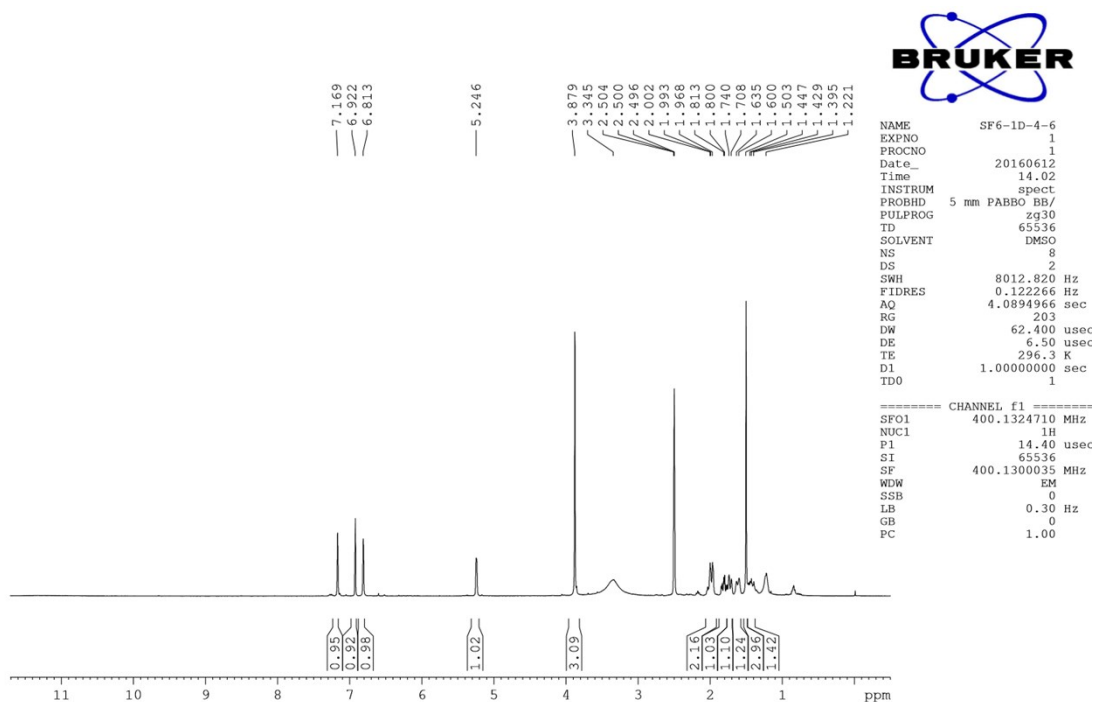

Figure S46. The <sup>13</sup>C-NMR spectrum of compound 11

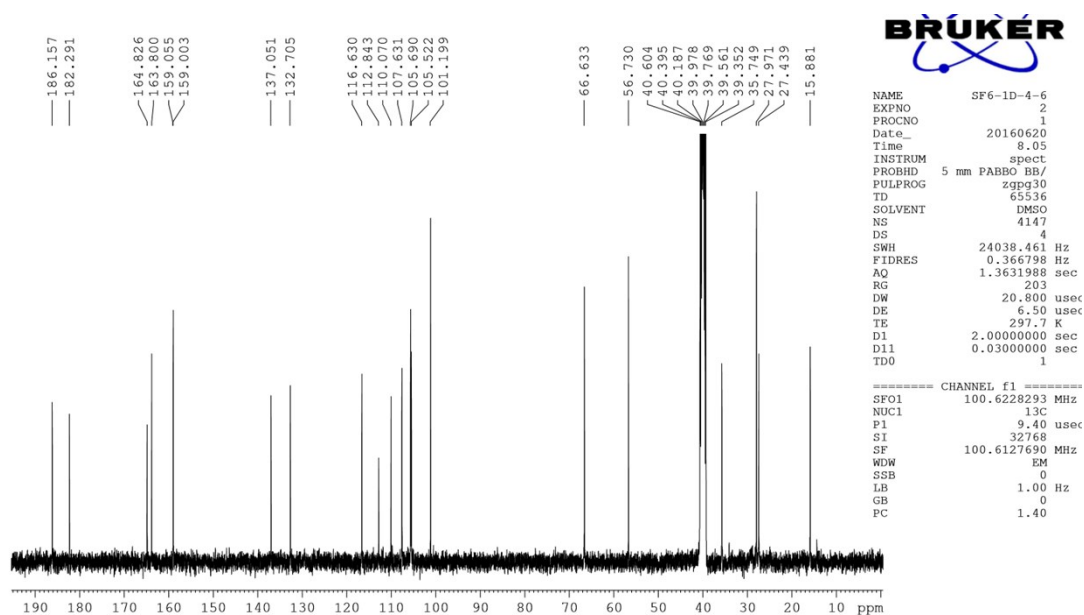

## 12. The spectra of compound 12

Figure S47. The  $^1\text{H-NMR}$  spectrum of compound 12

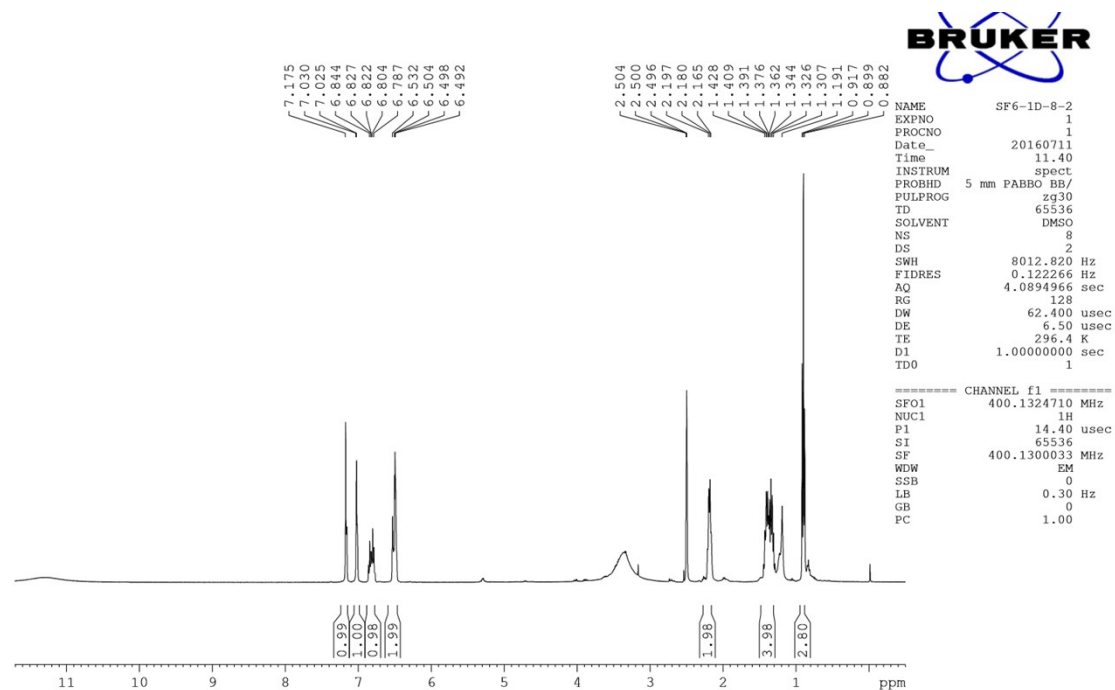

Figure S48. The  $^{13}\text{C-NMR}$  spectrum of compound 12

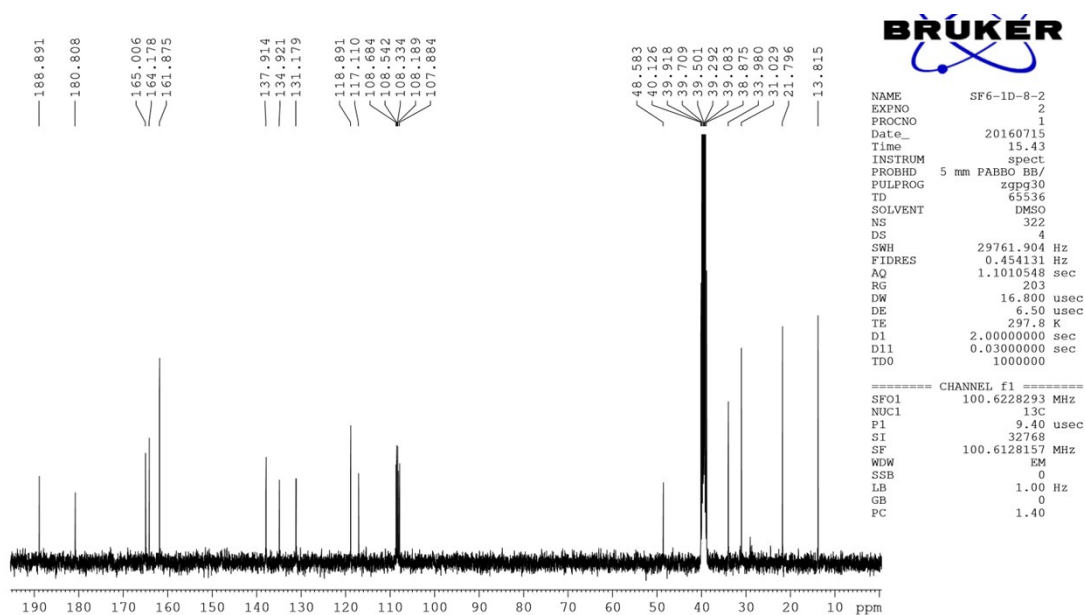

# 13. The spectra of compound 13

Figure S49. The  $^1\text{H-NMR}$  spectrum of compound 13

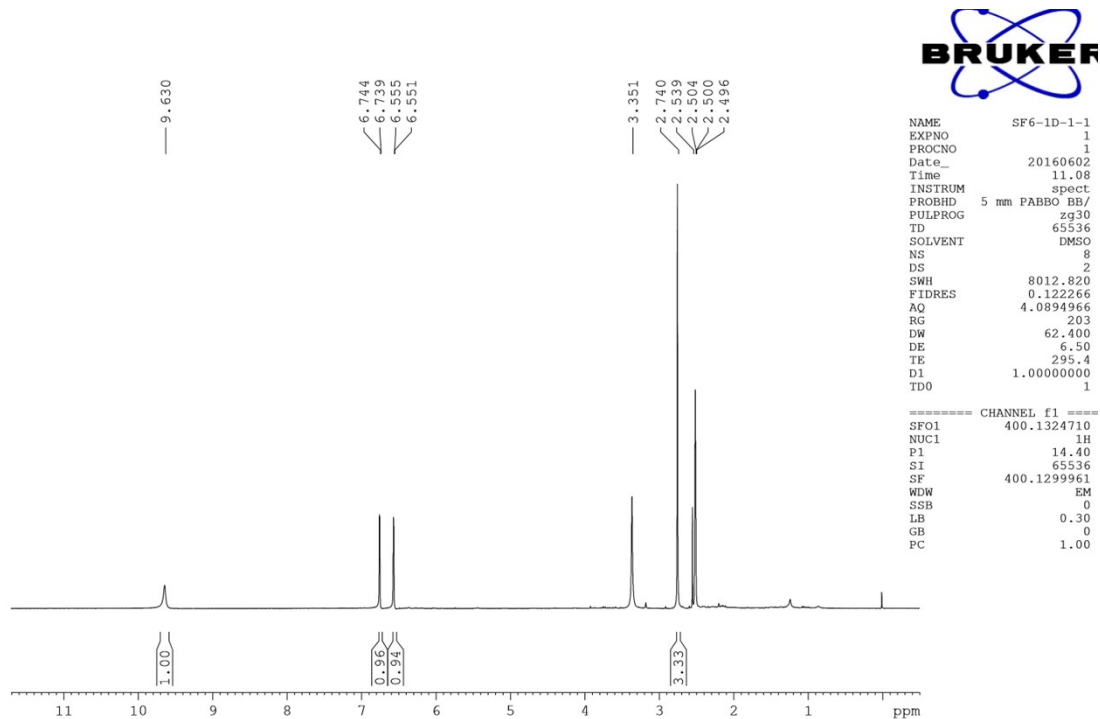

Figure S50. The  $^{13}\text{C-NMR}$  spectrum of compound 13

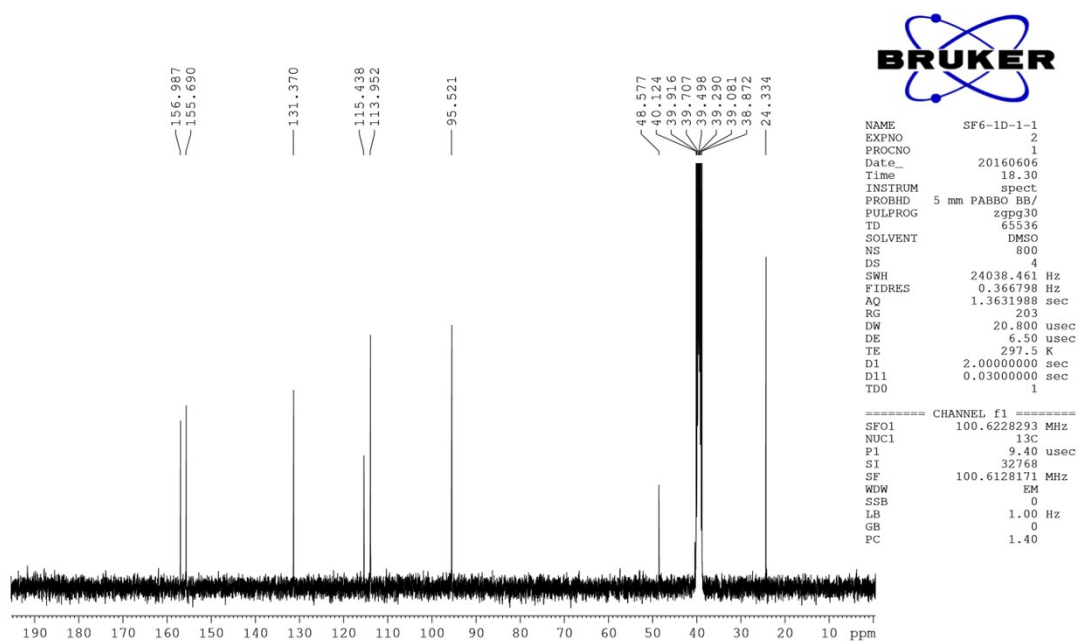

## 14. The spectra of compound 14

Figure S51. The  $^1\text{H}$ -NMR spectrum of compound 14

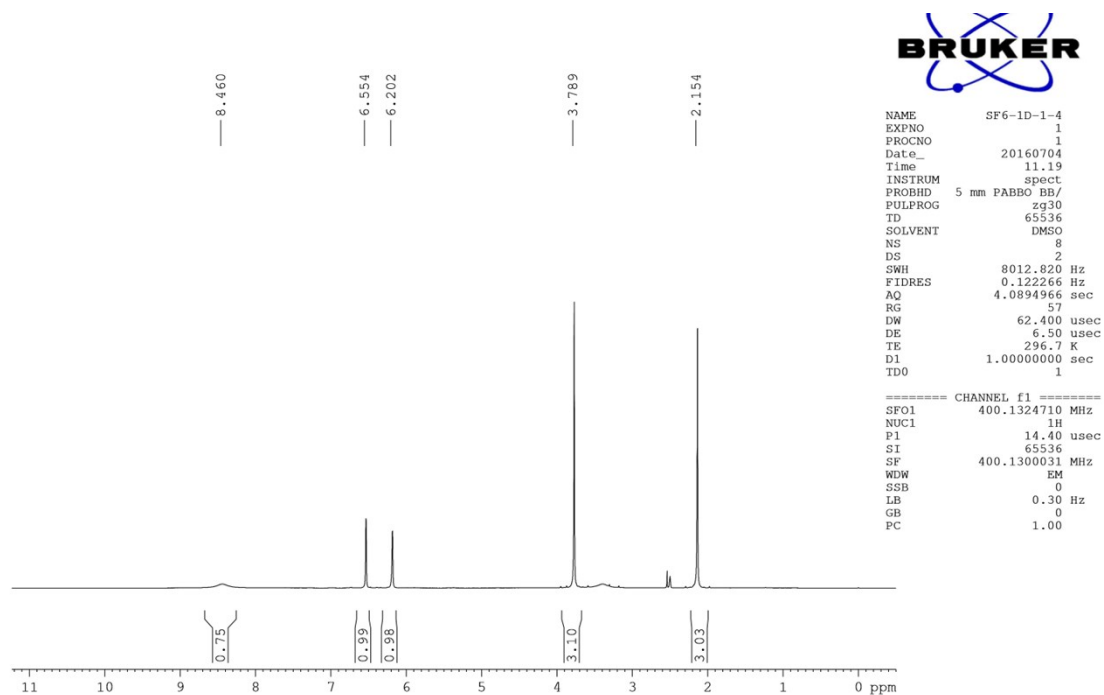

Figure S52. The  $^{13}\text{C}$ -NMR spectrum of compound 14

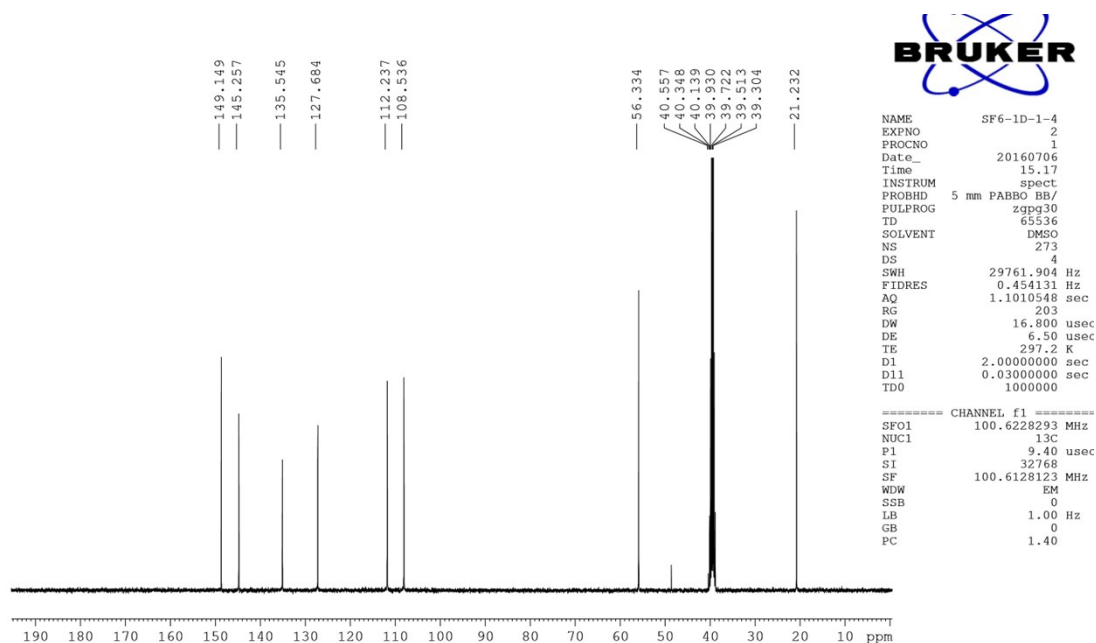

## 15. The spectra of compound 15

Figure S53. The  $^1\text{H}$ -NMR spectrum of compound 15

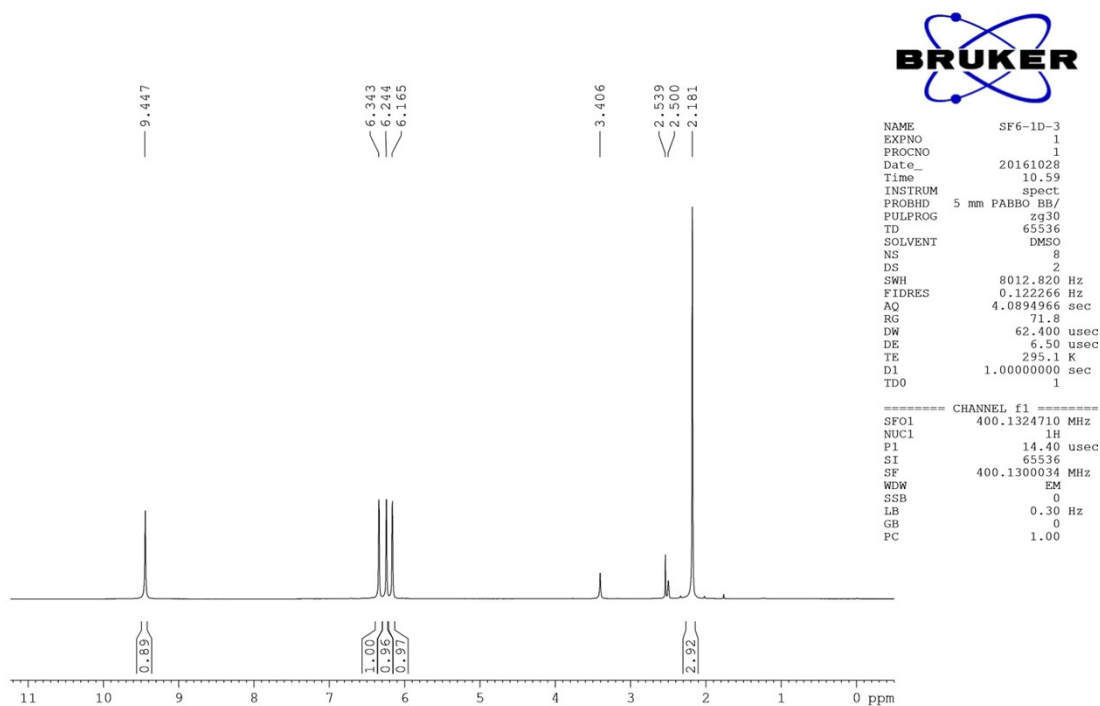

Figure S54. The  $^{13}\text{C}$ -NMR spectrum of compound 15

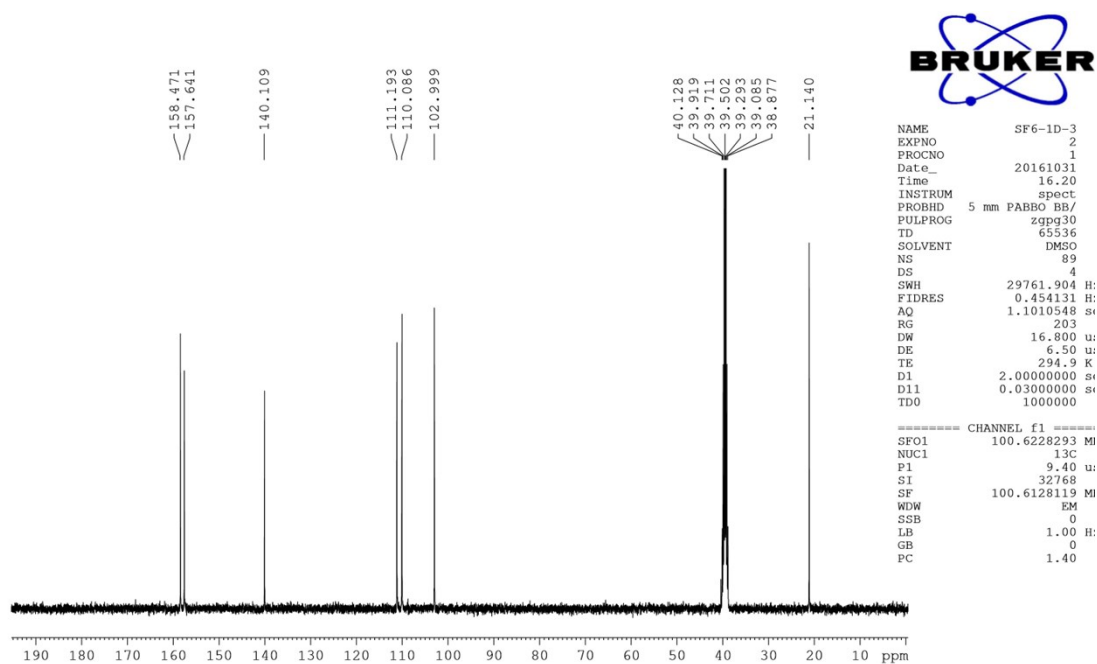

## 16. The spectra of compound 16

Figure S55. The  $^1\text{H-NMR}$  spectrum of compound 16

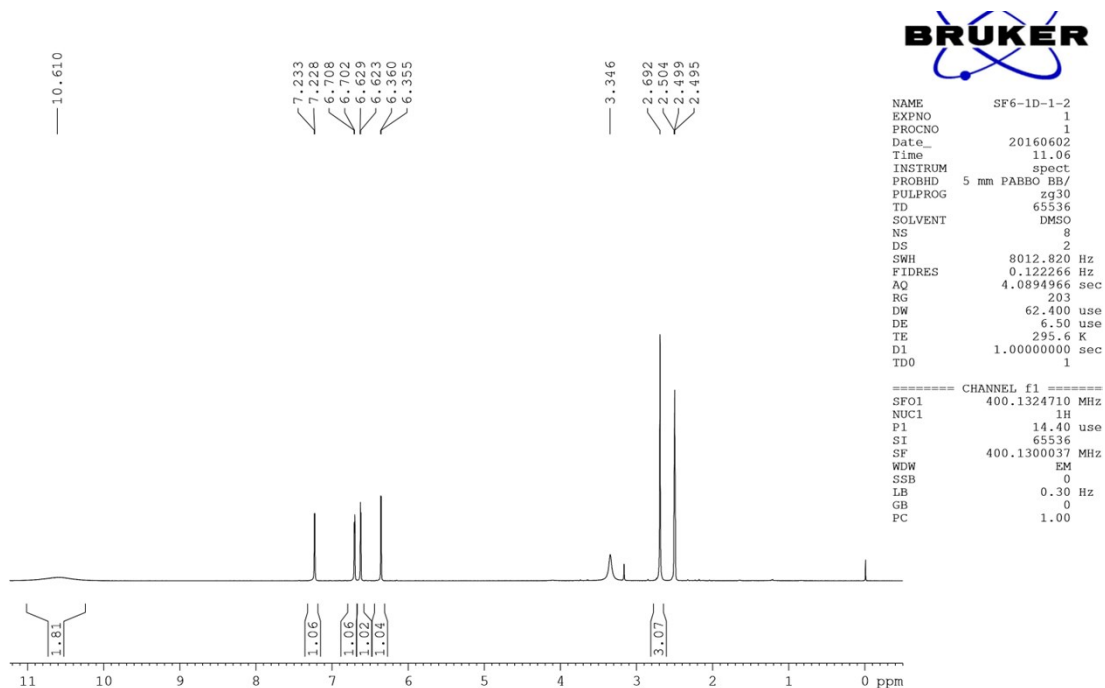

Figure S56. The  $^{13}\text{C-NMR}$  spectrum of compound 16

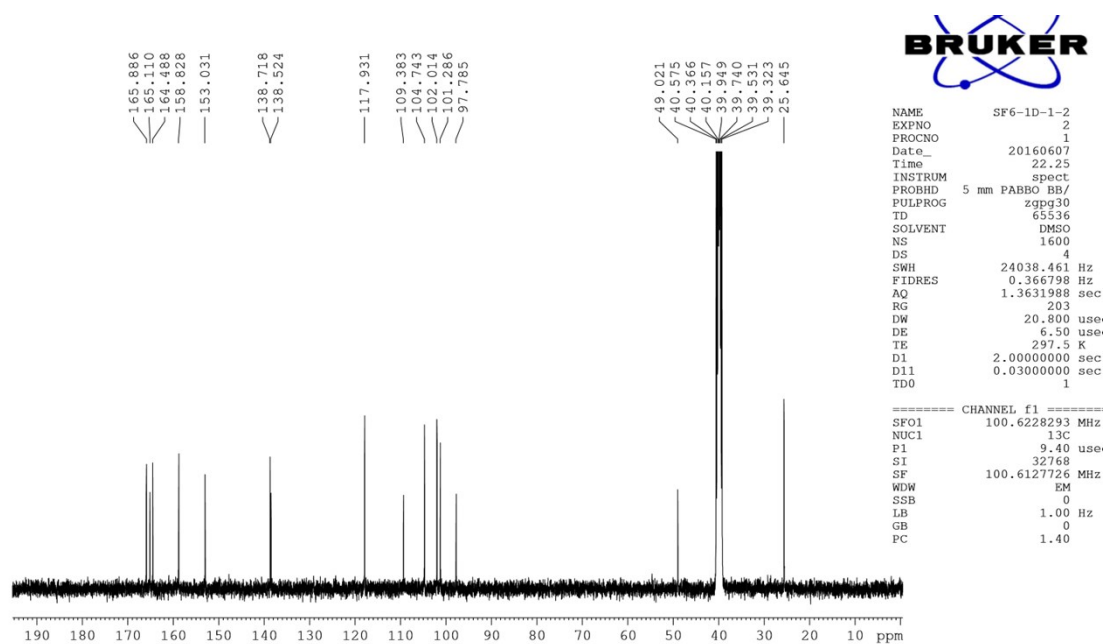

Supplement: d0ra08141h1.pdf [file d0ra08141h1.pdf]
